# Supplementary material for: Mesenchymal to Epithelial Transition (MET) in Cancer Progression: Insights from logical modeling
Source: Research Square preprint supplement (doi:10.21203/rs.3.rs-8386357/v1), 2025-12-30
Supplement: Supplementary file 1 [file 3843d785932537fda5598631.docx]

Supplementary material 2

#

**Mesenchymal to Epithelial Transition (MET) in Cancer Progression: Insights from logical modeling**

Sophia Orozco-Ruiz1,2,3, Marco Ruscone1,2,3, Emmanuel Barillot1,2,3, Olivier Destaing4, Laurence Calzone1,2,3

[**Supplementary Tables 1**](#_lvv5dz2p87al)

[**Supplementary Text 2**](#_1ae7v9im4fh4)

[**Supplementary Figures 4**](#_8fxqaj2gl7to)

##

## Supplementary Tables

| Signaling agents | Cell line | Role in colonization |
| --- | --- | --- |
| BMP7[1](https://www.zotero.org/google-docs/?nRaL5u) | MDA-231 (BC) | ? |
| cAMP[2](https://www.zotero.org/google-docs/?kNoNPo) | NAMEC8 (B) | ? |
| E-selectin expressed on the surface of BM cells[3](https://www.zotero.org/google-docs/?InsBl1) | SUM159, MDA-MB-231 (BC) | Yes |
| BMP secreted by CAFs[4](https://www.zotero.org/google-docs/?QHZXvW) | MMTV-PyMT (mouse BC) | Yes |
| Versican by myeloid cells[5](https://www.zotero.org/google-docs/?jqHliI) | MDA-MB-231 (BC) | Yes |
| CTGF[6](https://www.zotero.org/google-docs/?aZ7lRM) | SAS and FaDu (HNSCC) | ? |
| Lumican[7](https://www.zotero.org/google-docs/?pTtkXC) | MCF-7, MDA-MB-231 (BC) | ? |
| Presence of parenchymal liver cells[8](https://www.zotero.org/google-docs/?ShFDjP) | DU-145, PC-3 (PC) | ? |

Supplementary Table 1: **MET driven by microenvironmental factors.** Signaling agents identified as MET-promoting factors (column 1) have been studied in cell lines (column 2) and reported to have a role in colonization (column 3). Note that some studies used a specific derivative of the reported cell line and/or further validated their findings in cell lines not reported here. All the cell lines used presented a mesenchymal phenotype, which in some cases was obtained through EMT inducer treatment. BM: Bone Marrow, CAFs: Cancer-Associated Fibroblasts, BC: breast cancer, B: breast tissue, PC: prostate cancer, HNSSC: Head and neck squamous cell carcinoma.

| MET factor | Cell line | REF | Downstream targets |
| --- | --- | --- | --- |
| p53 | HMEC, MCF12A (B) | [9](https://www.zotero.org/google-docs/?D7JLeu) | Induces miR200 |
| miR200 | NMuMG (mouse B), 4TO7 (BC) | [10](https://www.zotero.org/google-docs/?hOa1Ub) | – |
| ∆Np63 | UM-UC3 (BLC) | [11](https://www.zotero.org/google-docs/?MBIvaa) | – |
| GRHL2 | HMLE (B), MDA-MB-231 (BC) | [12](https://www.zotero.org/google-docs/?fVdMT4) | – |
| OVOL2 | MDA-MB-231 (BC), PC3 (PC) | [13,14](https://www.zotero.org/google-docs/?fN20gJ) | – |
| OVOL1 | MDA-MB-231 (BC), PC3 (PC) | [13](https://www.zotero.org/google-docs/?gQycDL) | – |
| Elf5 | MDA-MB-231 (BC) | [15](https://www.zotero.org/google-docs/?h4Mqsk) | Represses SNAI2 |
| Klf4 | MDA-MB-231 (BC) | [16](https://www.zotero.org/google-docs/?uswRjW) | Induces ECAD |
| FBXO22 | MCF10A, MDA-MB-231, Hs578T (BC) | [17](https://www.zotero.org/google-docs/?oHInAc) | Represses SNAI1 |
| EHF | HOC313, TSU (HNSSC), MDA-MB-231 (BC) | [18](https://www.zotero.org/google-docs/?VlBQDN) | Represses ZEB1 and ZEB2 |
| CKB | PC3, LN3 (PC) | [19](https://www.zotero.org/google-docs/?9npS1d) | Represses AKT |
| LINC01133 | HCT116 (CC) | [20](https://www.zotero.org/google-docs/?FZqG2P) | Represses SRSF6 |
| Claudin 7 | SW620 (CC) | [21](https://www.zotero.org/google-docs/?dx2eSt) | Represses ERK and SRC through Rab25 |
| ID1 | HMLE (B) | [22](https://www.zotero.org/google-docs/?Jm7HkE) | – |
| C/EBPa | HMLE (B) | [23,24](https://www.zotero.org/google-docs/?LZrzLZ) | Induces P63 and represses ZEB1 |
| GATA3 | MDA-MB-231, Hs578T, 4T1 (BC) | [25](https://www.zotero.org/google-docs/?W664e5) | Induces miR-29b, which represses PDGF (RTK) |
| Reprogramming factors | HOC313, OSC-19 (OSCC) | [26](https://www.zotero.org/google-docs/?TiM2Fq) | Not clear, as it varies according to cell line |
| miR30a | H1299, Calu-1 (NSCLC) | [27,28](https://www.zotero.org/google-docs/?iD3Rrl) | Represses SNAI1 and VIM |
| RUNX3 | BGC-823, SGC-7901, AGS (GA) | [28](https://www.zotero.org/google-docs/?QAnk76) | Represses SNAI1 and VIM through miR30a |
| Rap1 | MDCK (K) | [29](https://www.zotero.org/google-docs/?gGpufz) | Required for cadherin junctions (AdhJunc) |
| PRRX1a | KPC1, KPC2 (mouse PanC) | [30](https://www.zotero.org/google-docs/?SKYtTh) | Mechanism not clear |

**Supplementary Table 2**: **MET driven by intracellular factors.** The intracellular MET-promoting factors (column 1) that have been studied in cell lines (column 2) with the corresponding reference (column 3). Note that the cell lines used in these studies presented a mesenchymal phenotype, which in some cases was obtained through EMT inducer treatment. BC: breast cancer, B: breast tissue, BLC: bladder cancer, PC: prostate cancer, HNSSC: Head and neck squamous cell carcinoma, CC: colorectal carcinoma, OSCC: oral squamous cell carcinoma, GA: gastric adenocarcinoma, PanC: Pancreatic cancer, NSCLC: non-small cell lung cancer, K: transformed kidney cells.

## Supplementary Text

In this section, we extend our description of the model, focusing on the roles of some of the proteins in the non-canonical TGFβ pathway that are included in the model.

***The role of ERK and AKT in TGFB-EMT programs***

Through its downstream effectors, ERK can activate ZEB1[35](https://www.zotero.org/google-docs/?mbCMbX). Both ERK and AKT can phosphorylate and inactivate GSK3*β*. When active,GSK3*β* degrades SNAI1/2 and the *β*-catenin (CTNNB1) that is liberated from its interaction with E-cadherin [36,37](https://www.zotero.org/google-docs/?Cko5I9)[.](https://docs.google.com/document/d/1zgSWMkYys-WiyzbE-pmt0t6oRmoRzxZbvgrRD_TQ2jI/edit#heading=h.14ykbeg) When *β*-catenin is not degraded, it can translocate to the nucleus and bind with members of the T-cell and lymphoid enhancer (TCF/LEF) factors and further promote EMT[38,39](https://www.zotero.org/google-docs/?ChSdWM)[.](https://docs.google.com/document/d/1zgSWMkYys-WiyzbE-pmt0t6oRmoRzxZbvgrRD_TQ2jI/edit#heading=h.3oy7u29) For instance,*β*catenin-TCF4 can induce ZEB1 and vimentin and MMT1-MMP[40–43](https://www.zotero.org/google-docs/?pBwmKD)[.](https://docs.google.com/document/d/1zgSWMkYys-WiyzbE-pmt0t6oRmoRzxZbvgrRD_TQ2jI/edit#heading=h.j8sehv) *β*-catenin-TCF4 can be regulated by miR200 which represses both CTNBB1 and TCF4[44,45](https://www.zotero.org/google-docs/?J6NDsq). AKT can further contribute to EMT by activating NFkB, which subsequently acts as a direct transcriptional activator of SNAI2, ZEB2, and TWIST1[38,46](https://www.zotero.org/google-docs/?vXjp6R)[.](https://docs.google.com/document/d/1zgSWMkYys-WiyzbE-pmt0t6oRmoRzxZbvgrRD_TQ2jI/edit#heading=h.338fx5o) Finally, JNK activates c-Jun, a component of theAP-1 complex which is in turn implicated in the transcriptional upregulation of ZEB1/2[47](https://www.zotero.org/google-docs/?nT6HiK) (**Figure 2**)[.](https://docs.google.com/document/d/1zgSWMkYys-WiyzbE-pmt0t6oRmoRzxZbvgrRD_TQ2jI/edit#heading=h.42ddq1a)Of note,ERK can also activate JNK and upregulate the AP-1 complex component Fra-1, highlighting the cooperation between these signaling cascades[48–50](https://www.zotero.org/google-docs/?k8oRdR)[.](https://docs.google.com/document/d/1zgSWMkYys-WiyzbE-pmt0t6oRmoRzxZbvgrRD_TQ2jI/edit#heading=h.3gnlt4p)

***The role of the NRTK***

TGF*β* is also involved in the activation of non-receptor tyrosine kinases (NRTK) PYK2, FAK, and SRC. On one hand, SRC and FAK cooperate with integrins, such as *β*3, to phosphorylate TGFβR-II and allow TGF*β* to induce MAPK-ERK and other pathways[31–33](https://www.zotero.org/google-docs/?uDzLmS)[.](https://docs.google.com/document/d/1zgSWMkYys-WiyzbE-pmt0t6oRmoRzxZbvgrRD_TQ2jI/edit#heading=h.47hxl2r) On the other hand, TGF*β* has been shown to increase PYK2 activity, an effect dependent on TGFβR-I, SRC, and SMAD4[34](https://www.zotero.org/google-docs/?79OWdG) (**Figure 2 in the main text and** **Supplementary Figure 1**).

NRTKs are important players of EMT, acting as mediators of several processes: (1) the disorganization of E-cadherin cell-cell contacts [51](https://www.zotero.org/google-docs/?VoWD00), (2) the formation of invadosome, which is a structure crucial for ECM degradation, (3) the basement membrane penetration [52](https://www.zotero.org/google-docs/?NBb7dQ)[,](https://docs.google.com/document/d/1zgSWMkYys-WiyzbE-pmt0t6oRmoRzxZbvgrRD_TQ2jI/edit#heading=h.1vsw3ci) and (4) the activation of several pathways such as Ras-ERK and STAT3 upon signaling through Receptor Tyrosine Kinases (RTKs), which can be activated by several growth factors (GF) and clusters of integrins [53–55](https://www.zotero.org/google-docs/?klStxS)[.](https://docs.google.com/document/d/1zgSWMkYys-WiyzbE-pmt0t6oRmoRzxZbvgrRD_TQ2jI/edit#heading=h.1a346fx)RTKs also activate other pathways, such as PI3K-AKT [56](https://www.zotero.org/google-docs/?7USfZZ). Downstream of integrins and GF, SRC can drive the phosphorylation and destabilization of Adherens Junction,leading to the release of *β*-catenin from E-cadherin[57](https://www.zotero.org/google-docs/?qMEYe0)[.](https://docs.google.com/document/d/1zgSWMkYys-WiyzbE-pmt0t6oRmoRzxZbvgrRD_TQ2jI/edit#heading=h.3u2rp3q)TGF*β* can activate SRC directly through its receptor and by inducing its activators [58,59](https://www.zotero.org/google-docs/?0rJUwO)[**.**](https://docs.google.com/document/d/1zgSWMkYys-WiyzbE-pmt0t6oRmoRzxZbvgrRD_TQ2jI/edit#heading=h.odc9jc)For instance, TWIST1 induced by TGF*β*-EMT can activate the transcription of PDGFR*α* (a RTK highly linked to the direct activation of SRC) and its ligand to mediate invadosome formation through the TWIST-PDGFR*α*-SRC signaling axis[60](https://www.zotero.org/google-docs/?zV2tOP)[.](https://docs.google.com/document/d/1zgSWMkYys-WiyzbE-pmt0t6oRmoRzxZbvgrRD_TQ2jI/edit#heading=h.38czs75)

PYK2 can activate STAT3, which in turn binds to the TWIST1 promoter and activates its transcription[56,61](https://www.zotero.org/google-docs/?AKM34W)[.](https://docs.google.com/document/d/1zgSWMkYys-WiyzbE-pmt0t6oRmoRzxZbvgrRD_TQ2jI/edit#heading=h.3ls5o66) PYK2 forms a positive feedback loop with STAT3, the latter being crucial for PYK2 activation in response to EGF. In this condition, PYK2 cooperates with SRC to activate the ERK pathway[56](https://www.zotero.org/google-docs/?9WsVu4)[.](https://docs.google.com/document/d/1zgSWMkYys-WiyzbE-pmt0t6oRmoRzxZbvgrRD_TQ2jI/edit#heading=h.11si5id) Moreover, EGF and SRC also cooperate to activate STAT3, which further promotes PYK2 signal[62](https://www.zotero.org/google-docs/?TJZ3j8)[.](https://docs.google.com/document/d/1zgSWMkYys-WiyzbE-pmt0t6oRmoRzxZbvgrRD_TQ2jI/edit#heading=h.20xfydz)

## Supplementary Figures


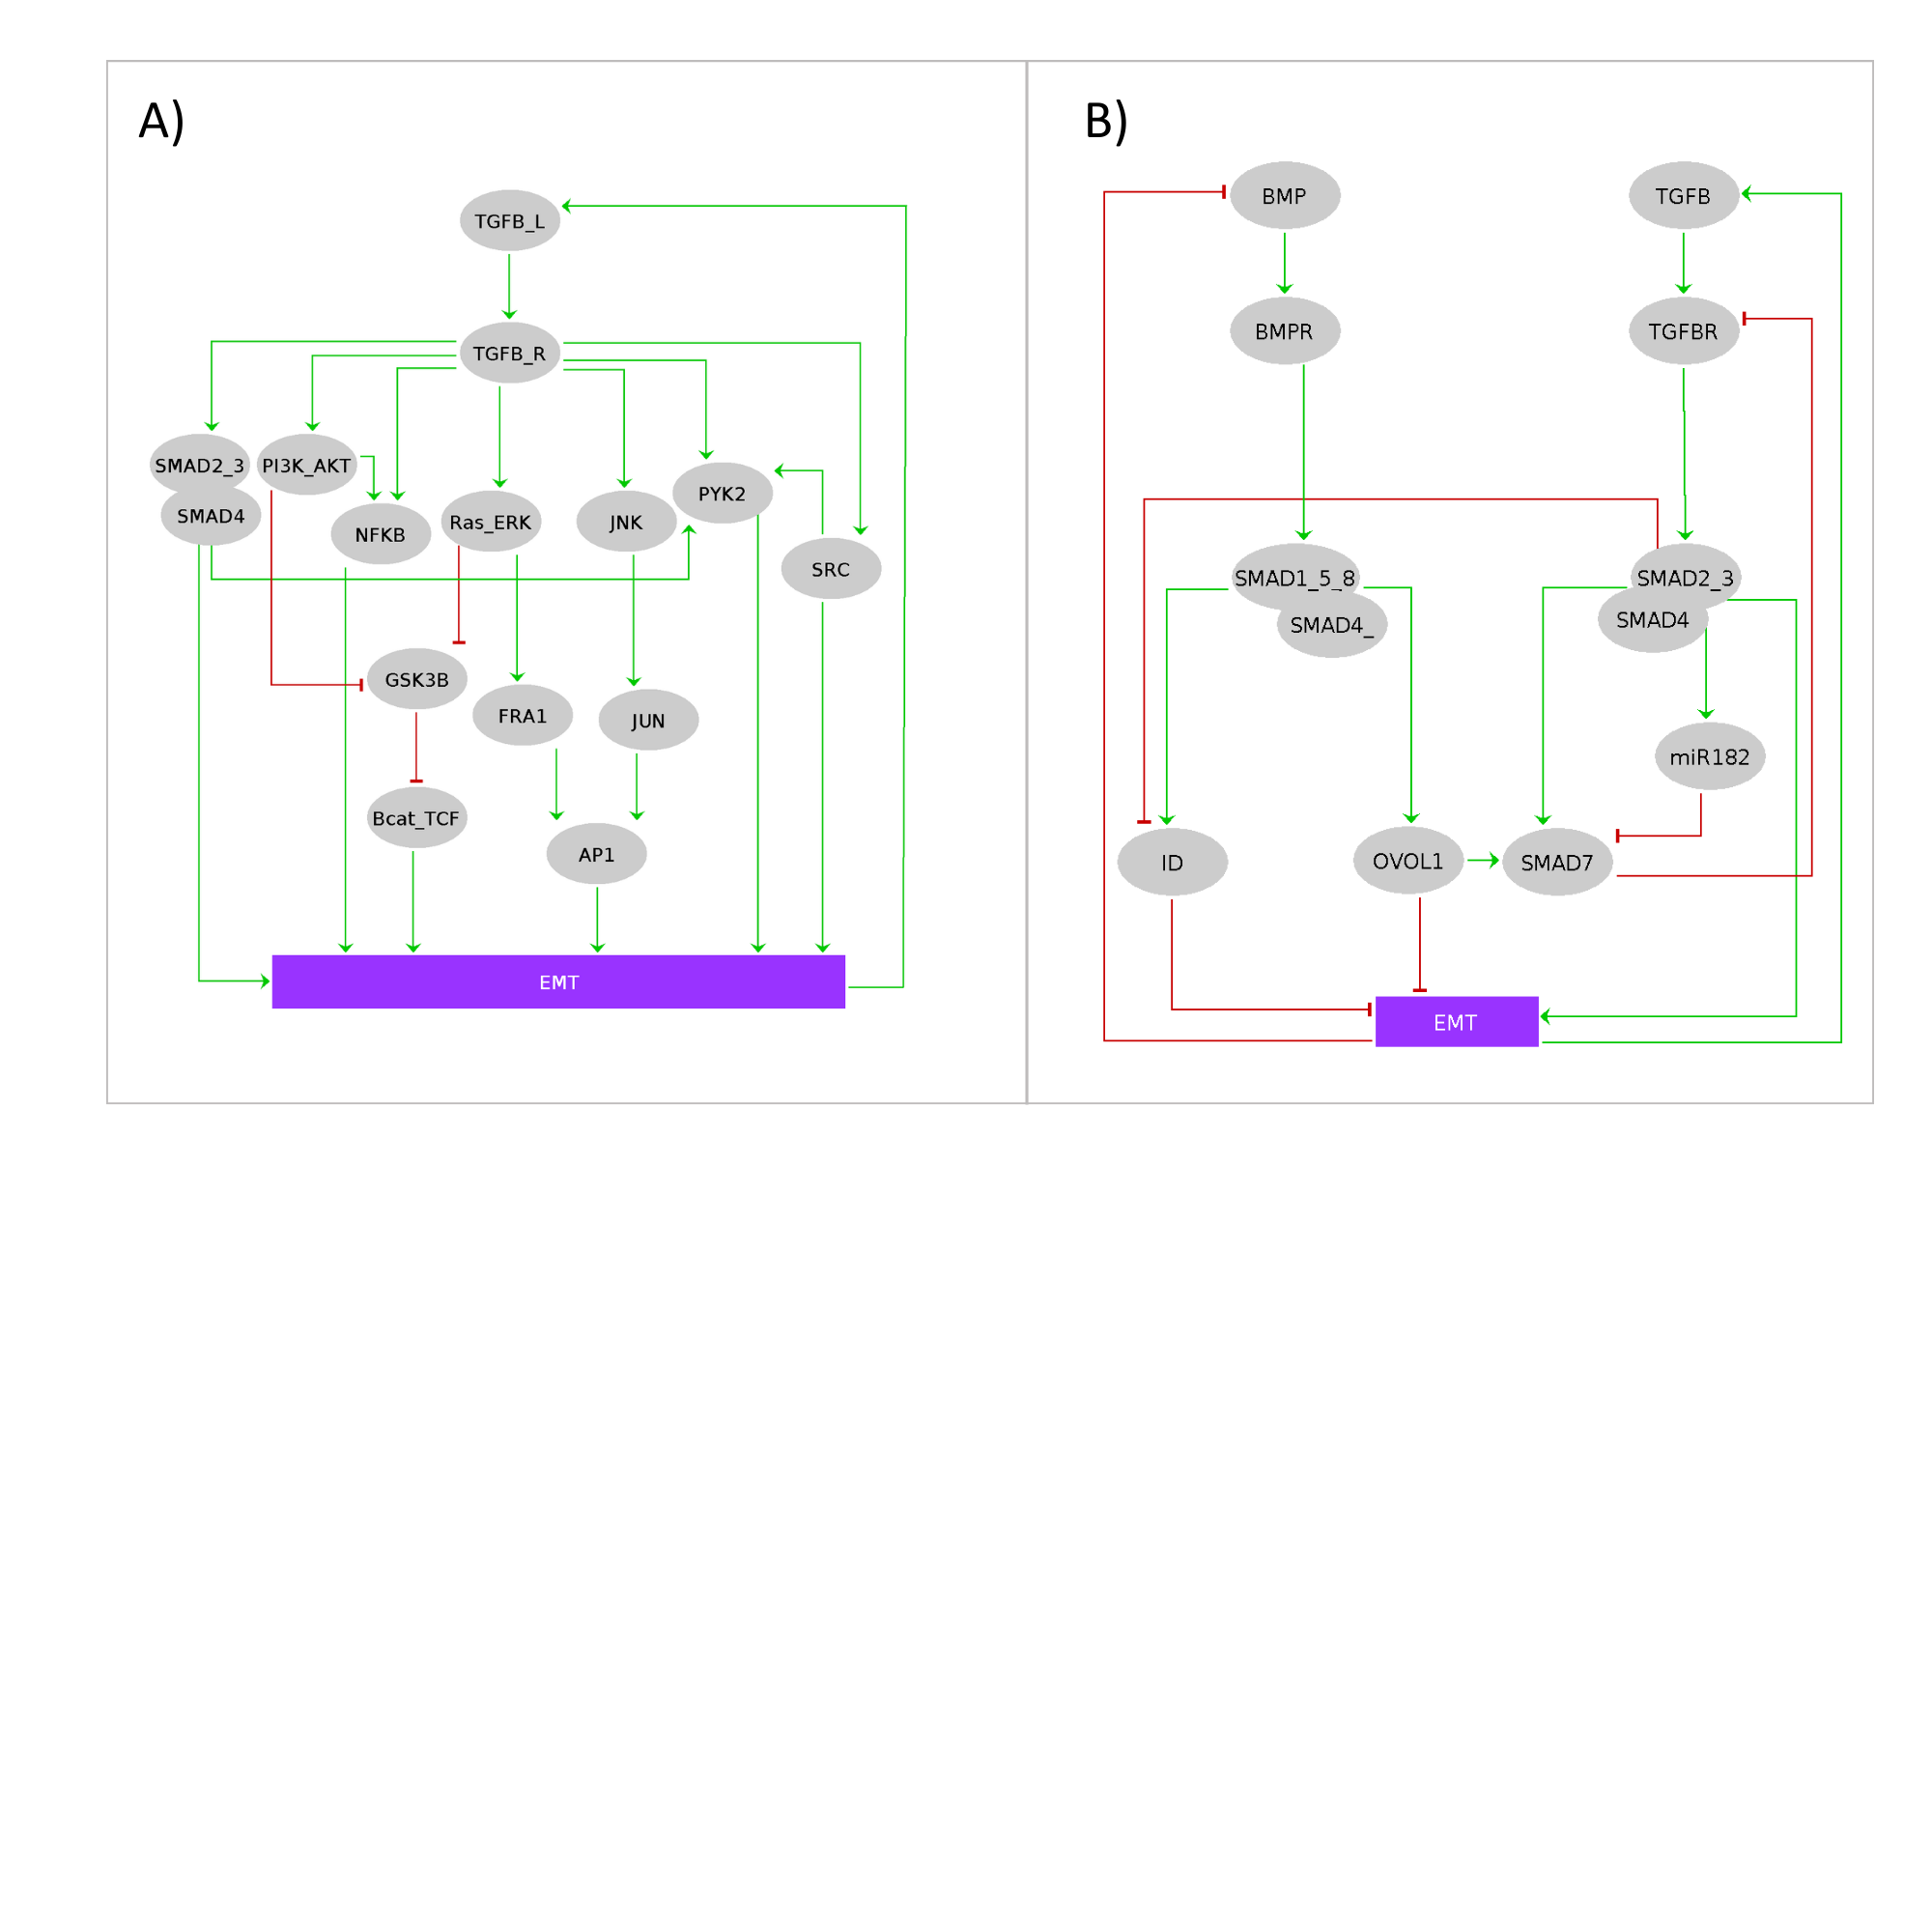


**Supplementary Figure 1: A)** Main axis of the TGF*β*-EMT program. **B)** BMP and TGF*β* interfere with each other. Regulatory network of the interactions between EMT-TFs and some MET drivers.

**
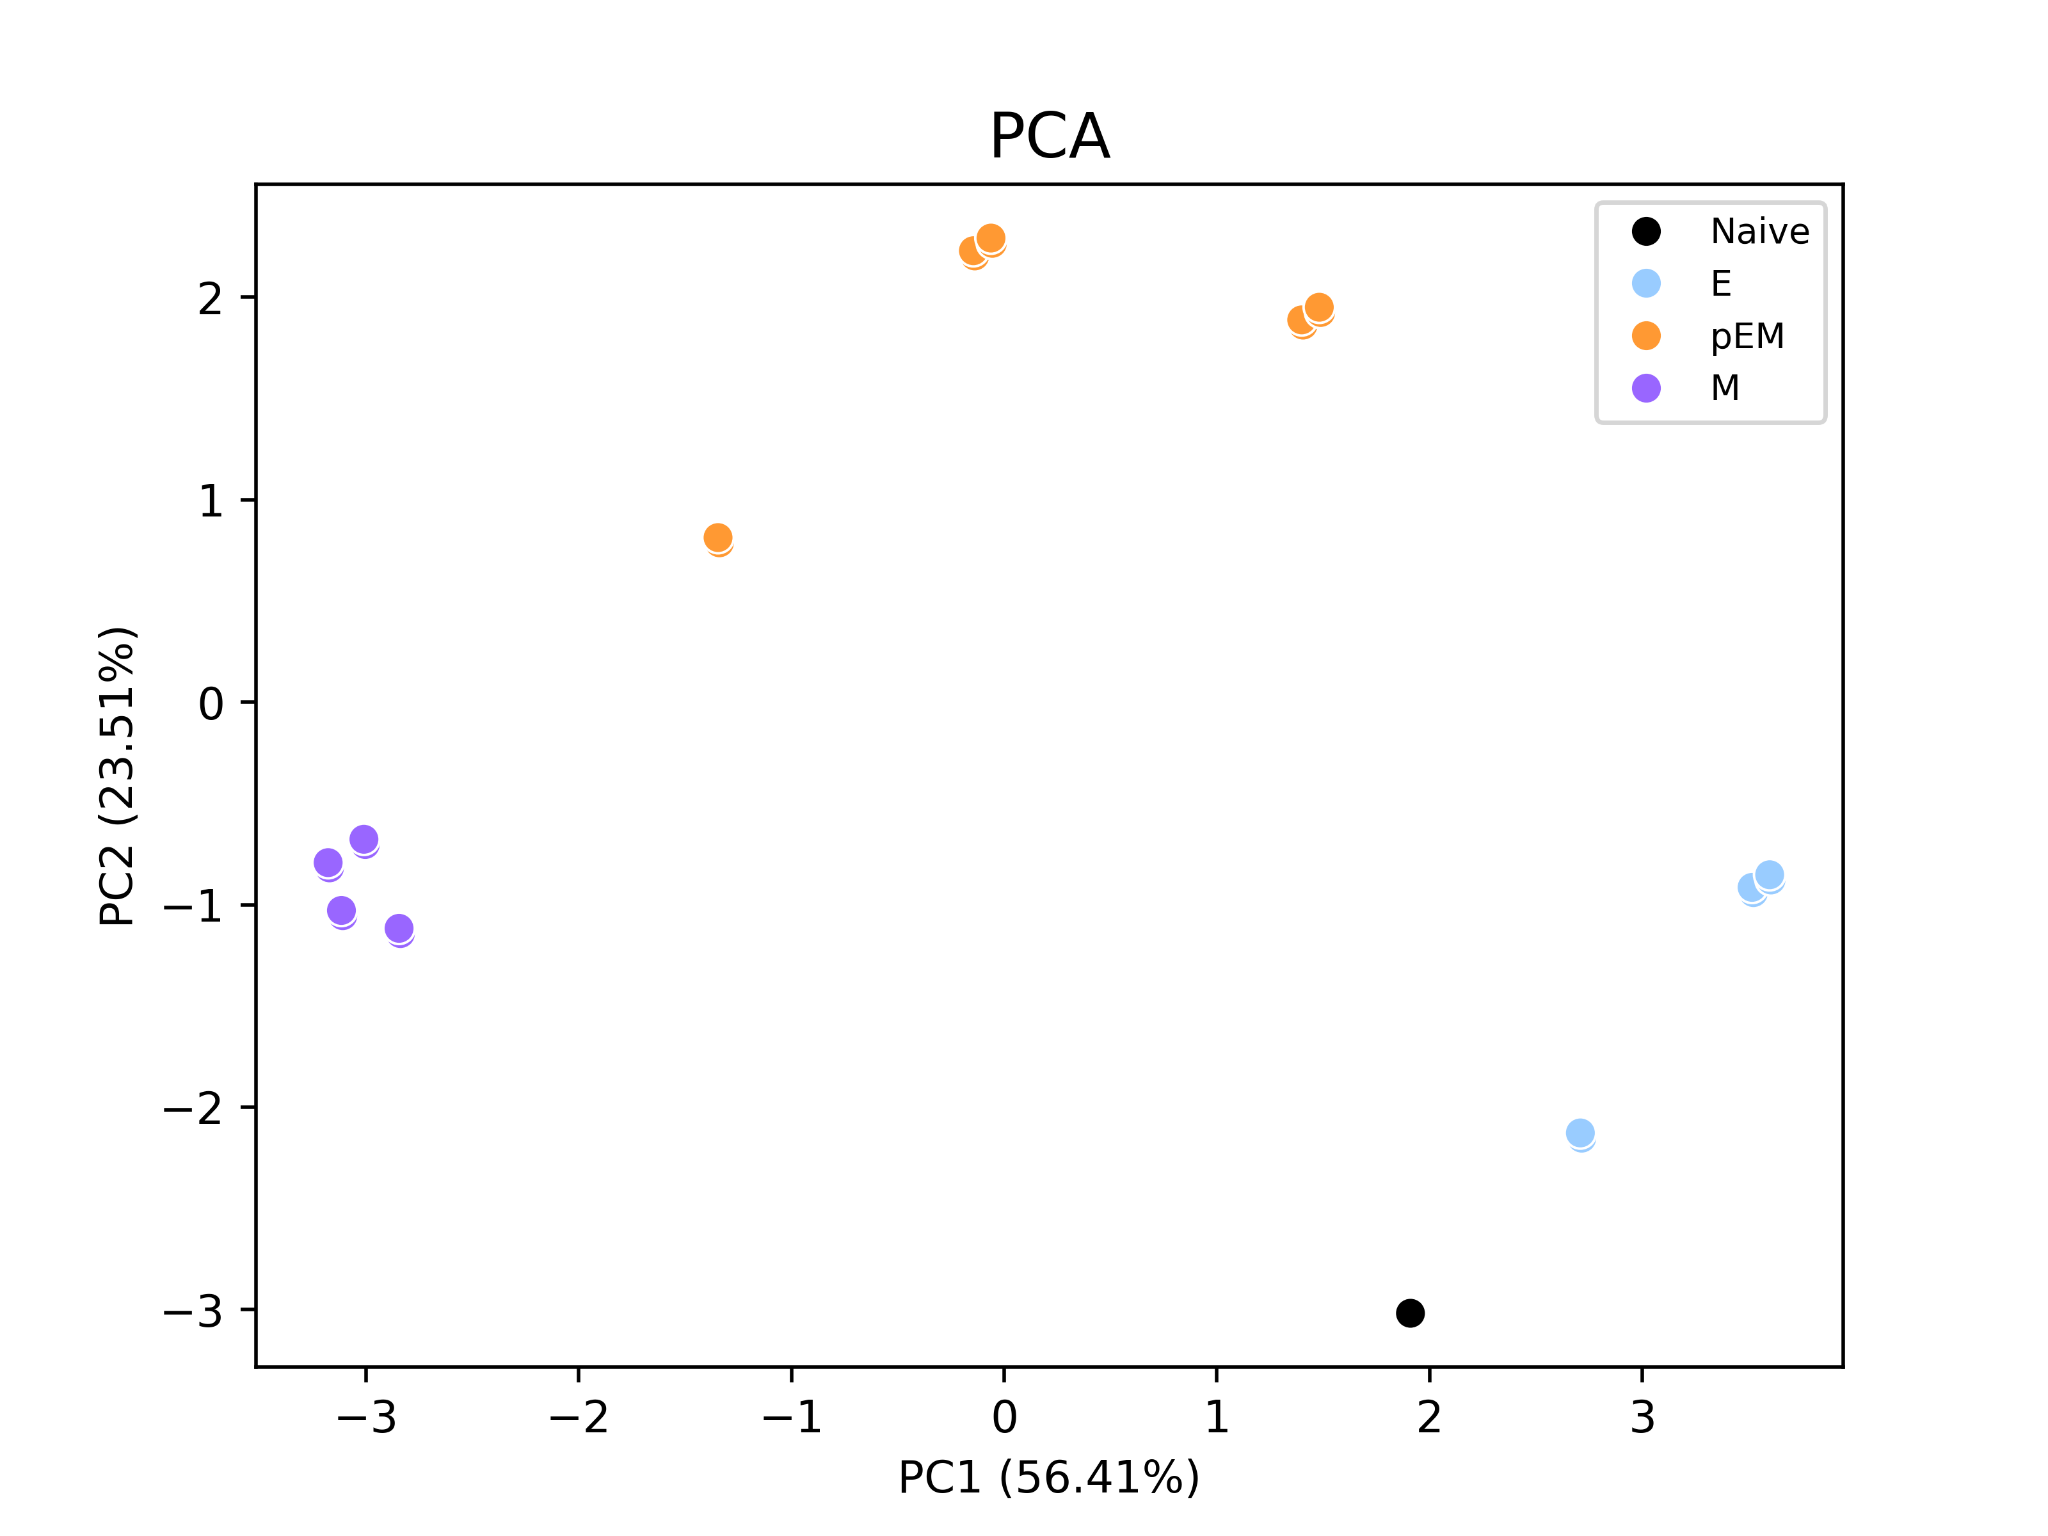
**

**Supplementary Figure 2:** PCA plot showing PC1 and PC2 of the model steady states. Color indicates phenotype. Similar stable states cluster together according to the 4 phenotypes defined in the text..

**
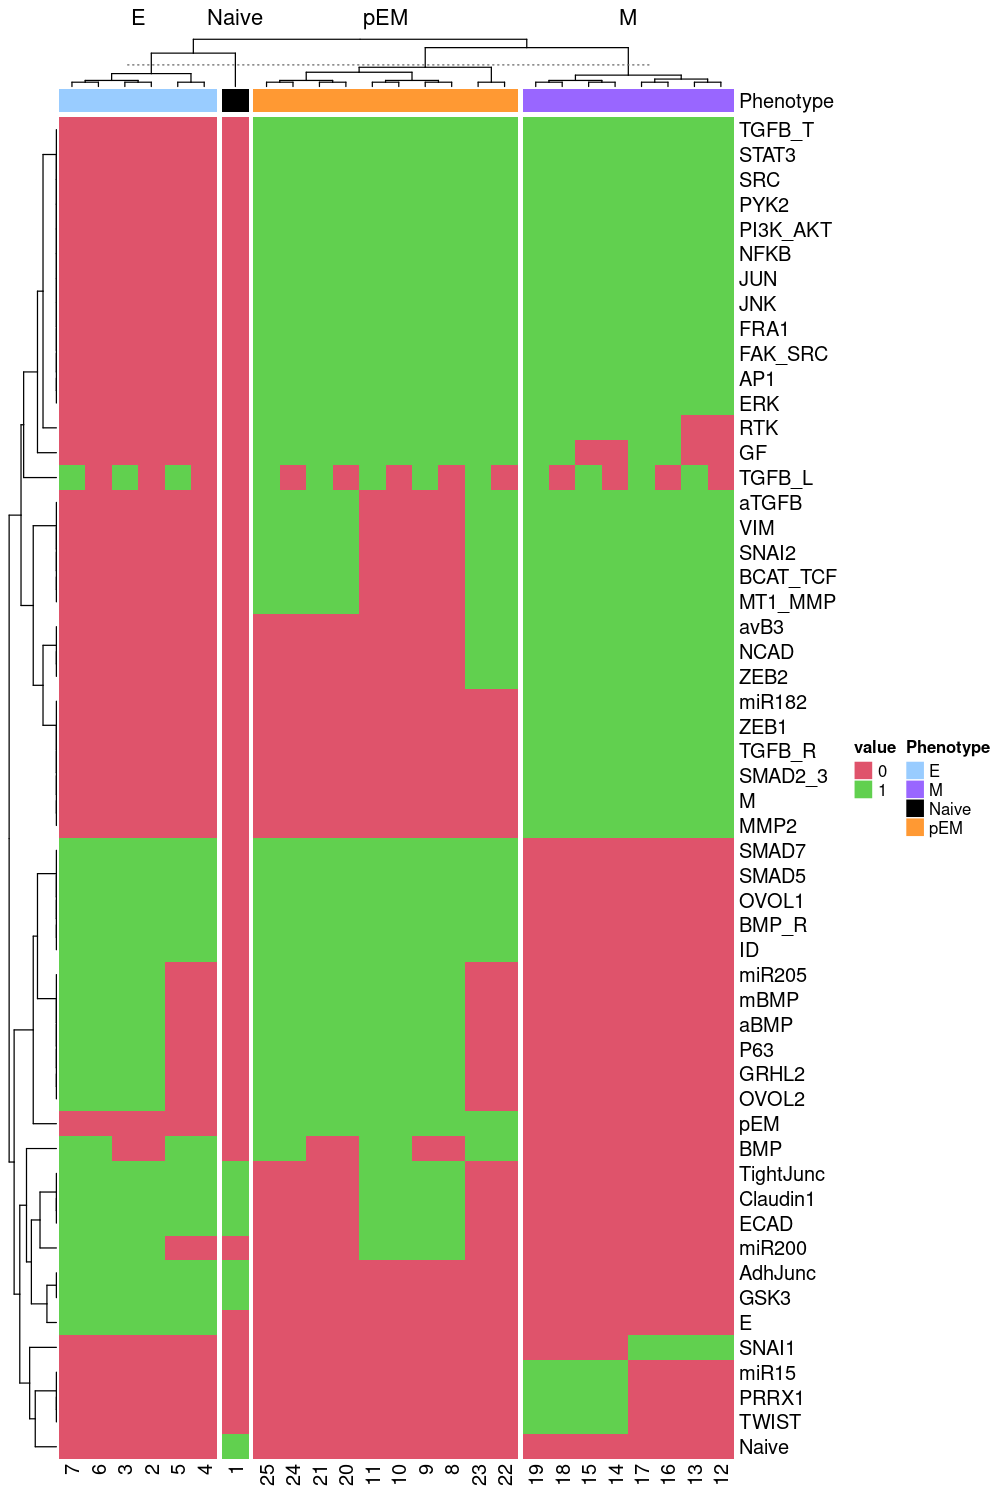
**

**Supplementary Figure 3:** The 25 steady states of the model showing all the nodes’s status.

**
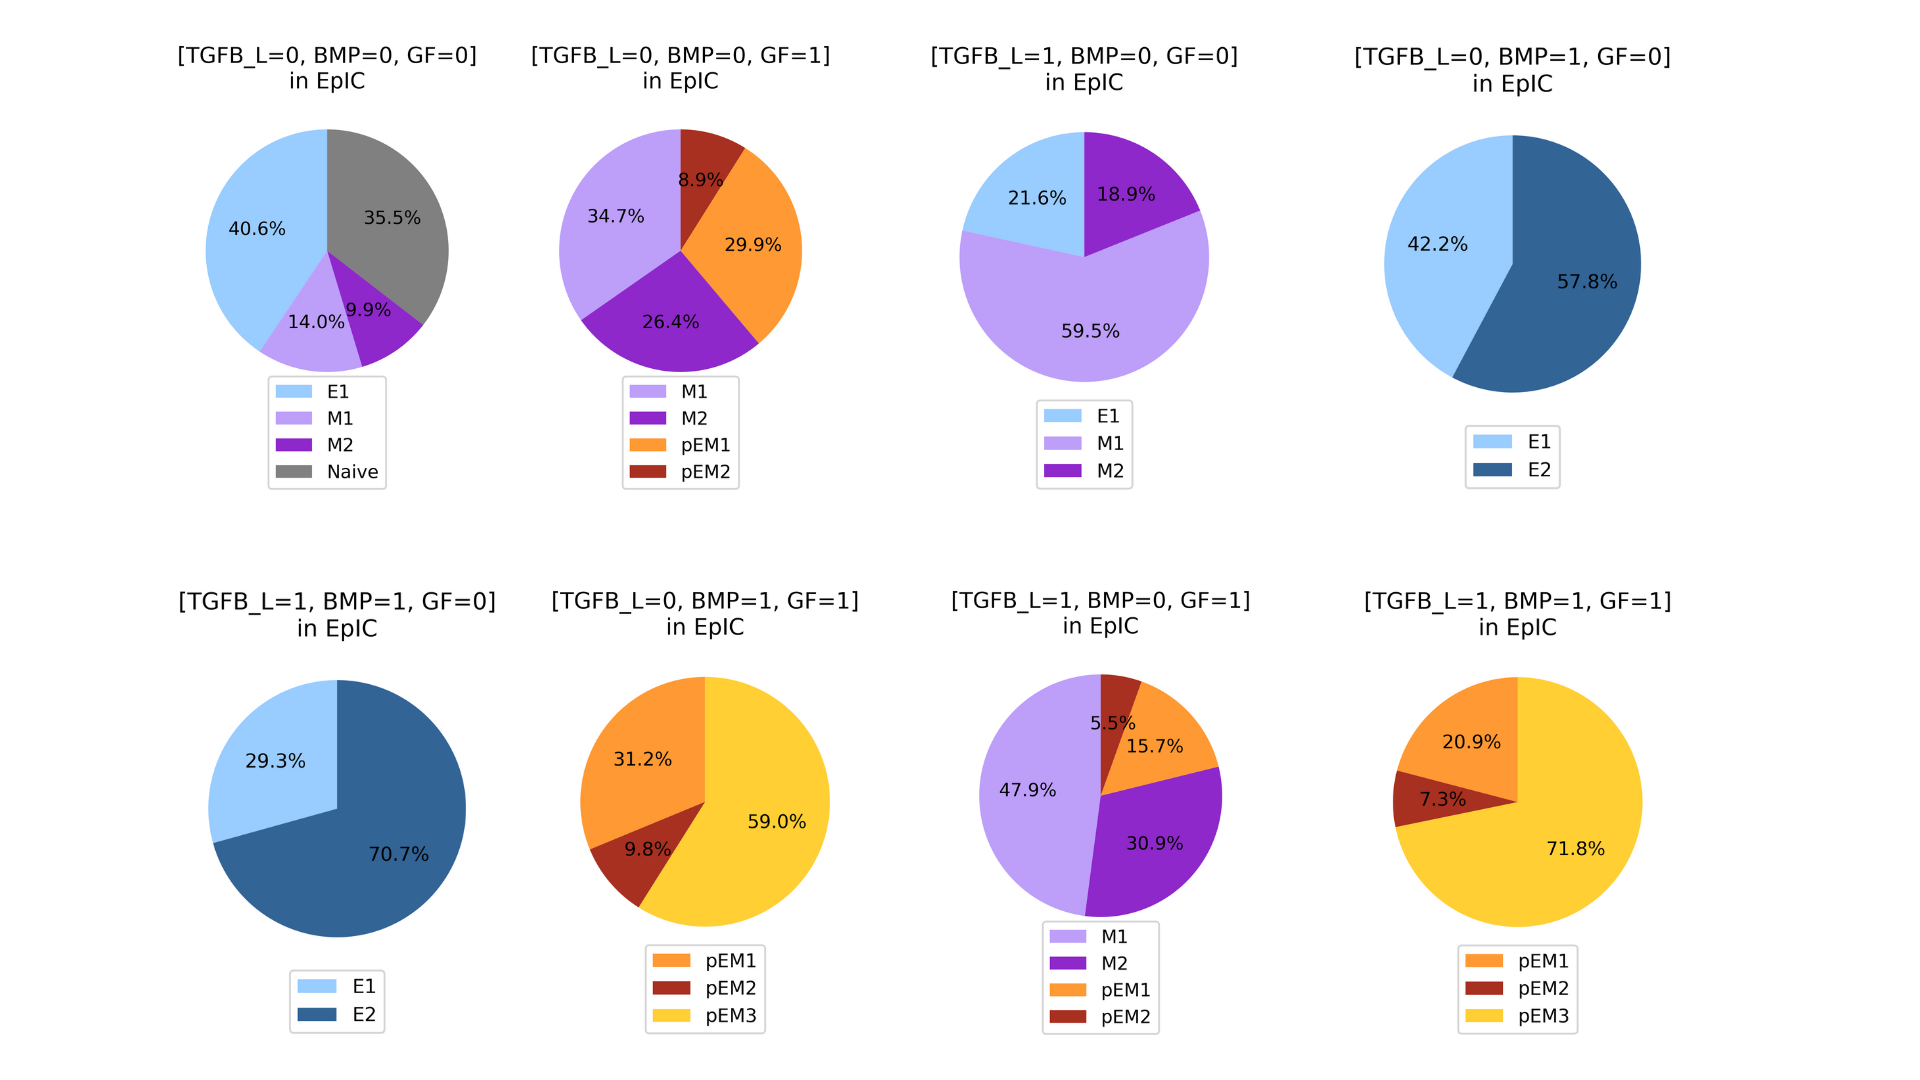
Supplementary Figure 4:** Final node probabilities of simulations under epithelial initial condition (EpiIC) under different Input combinations.


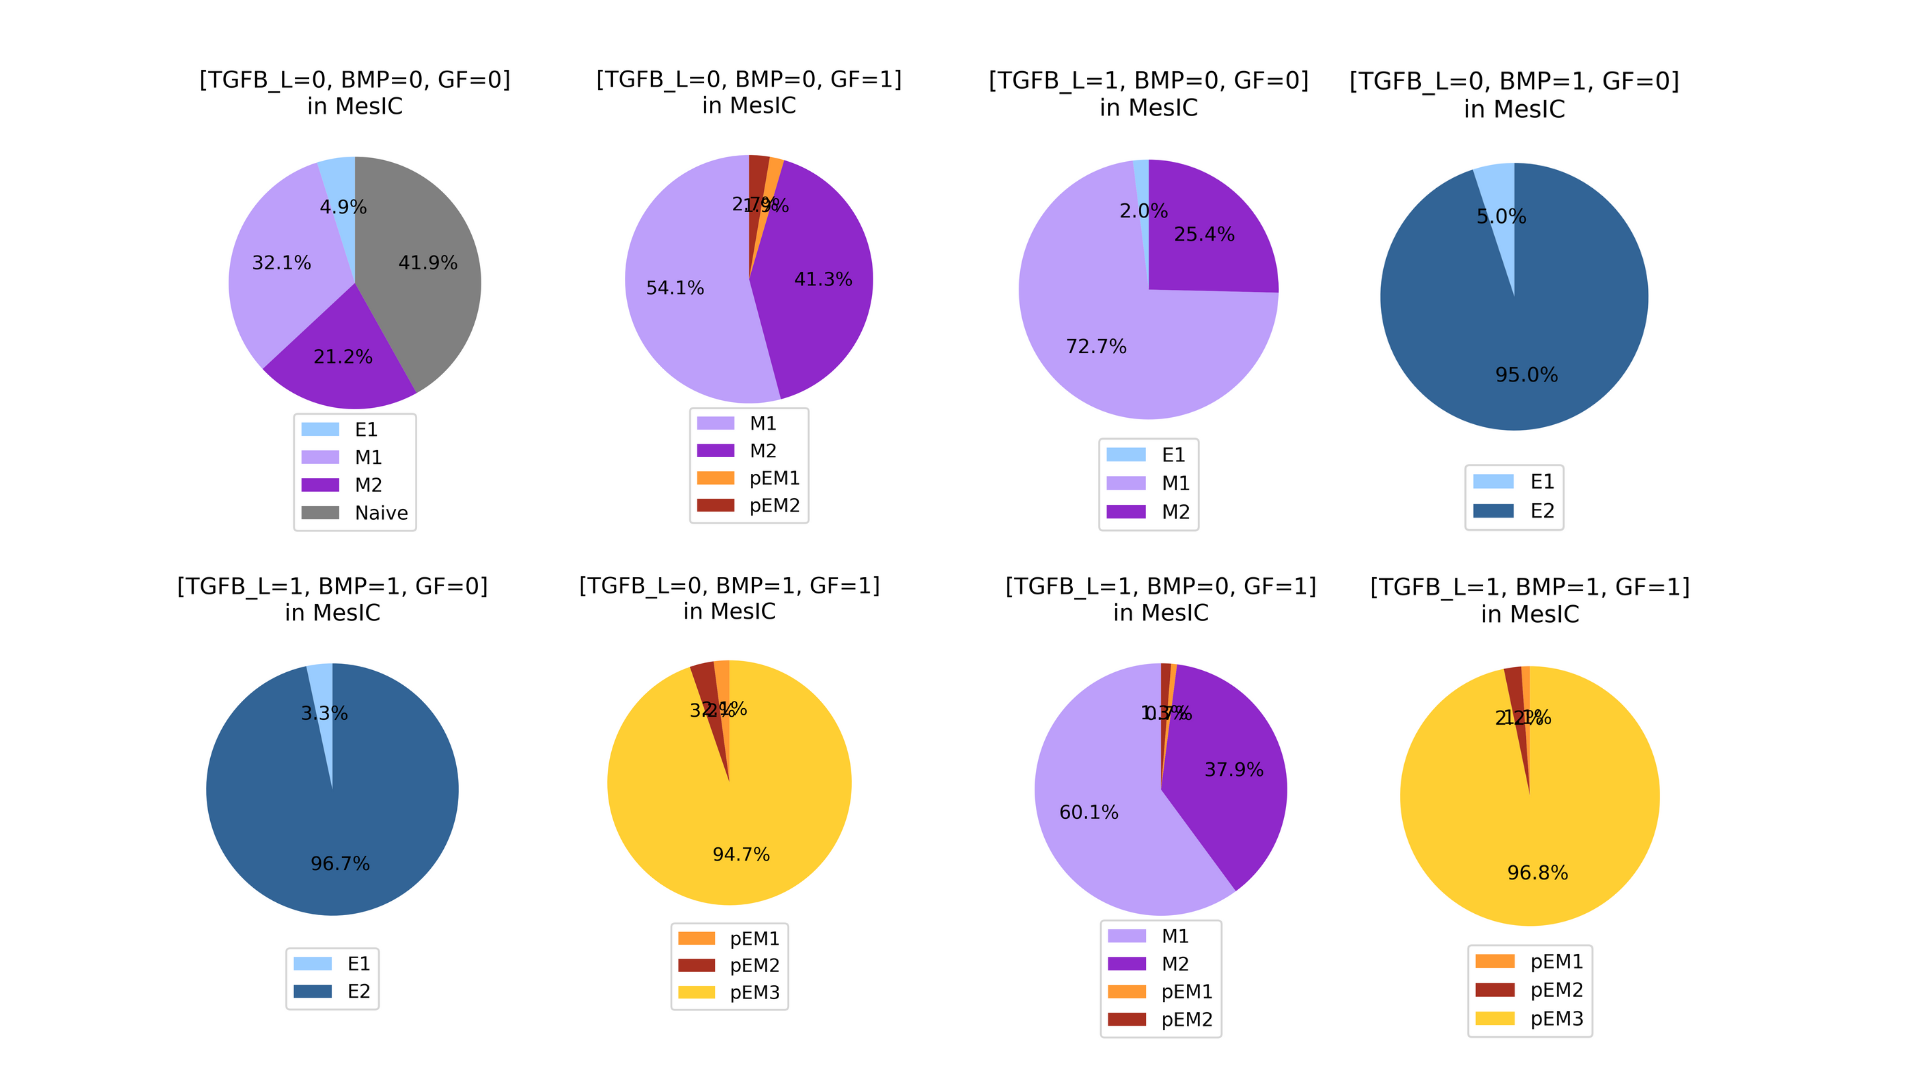


**Supplementary Figure 5:** Final node probabilities of simulations under mesenchymal initial condition (MesIC) under different Input combinations.


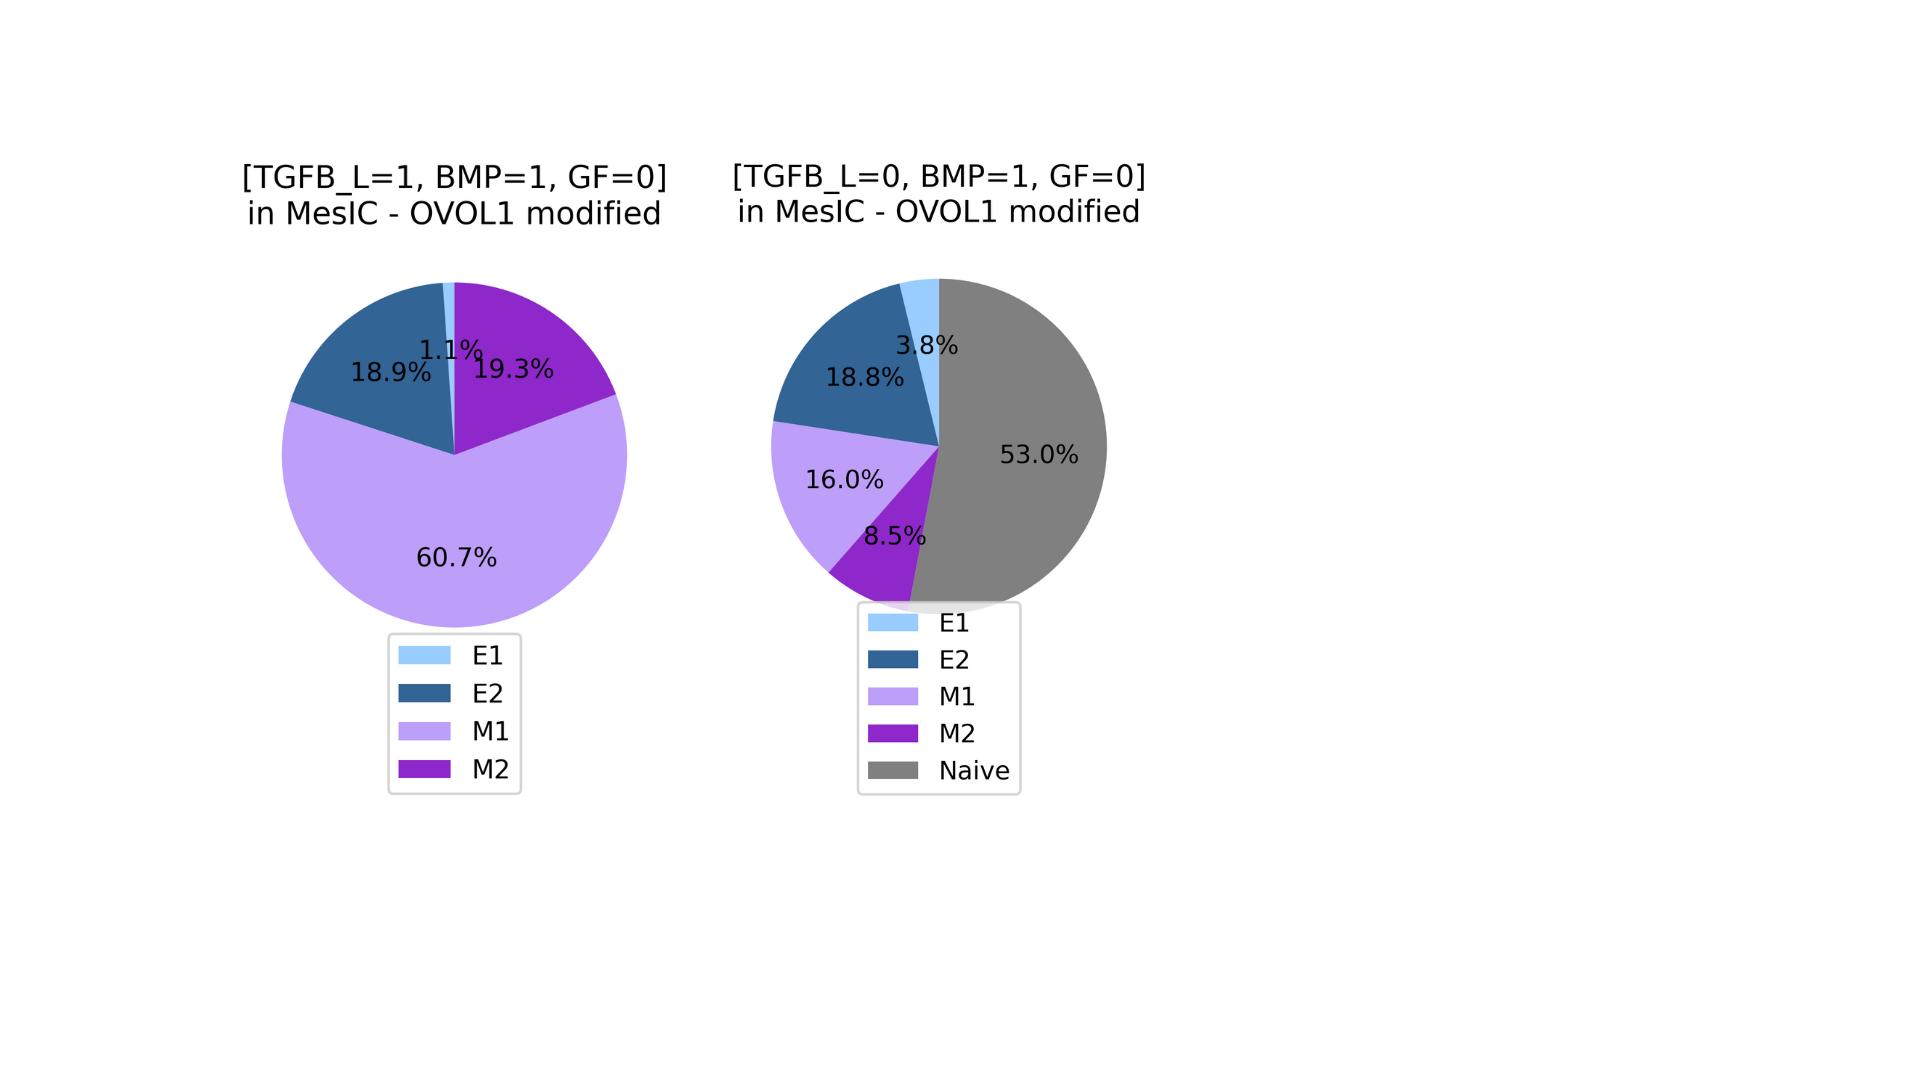


**Supplementary Figure 6:** Final node probabilities of simulations under mesenchymal initial condition (MesIC) under different Input combinations for OVOL1 modified model.

**
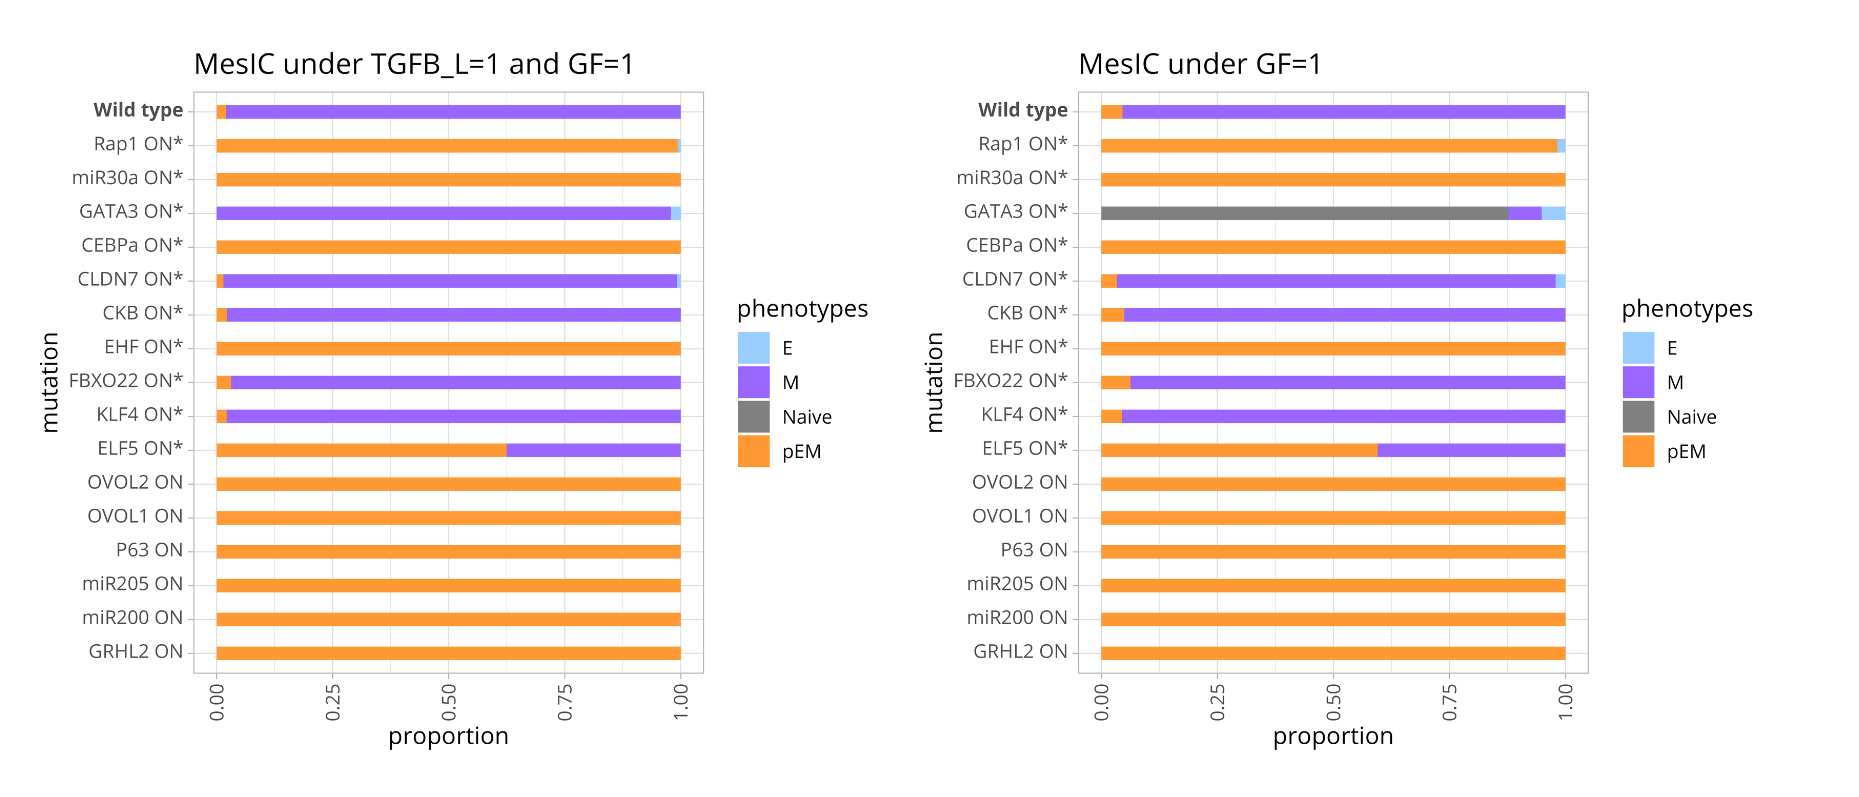
**

**Supplementary Figure 7:** Activating mutations of MET drivers. Each row represents the proportion of the final state probabilities, according to the phenotype. Mutations of nodes not included in the network are indicated by *. Mutant simulations were performed in MesIC with inputs TGFB_L=1, BMP=0, GF=1 (**left**) and TGFB_L=0, BMP=0, GF=1 (**right**).


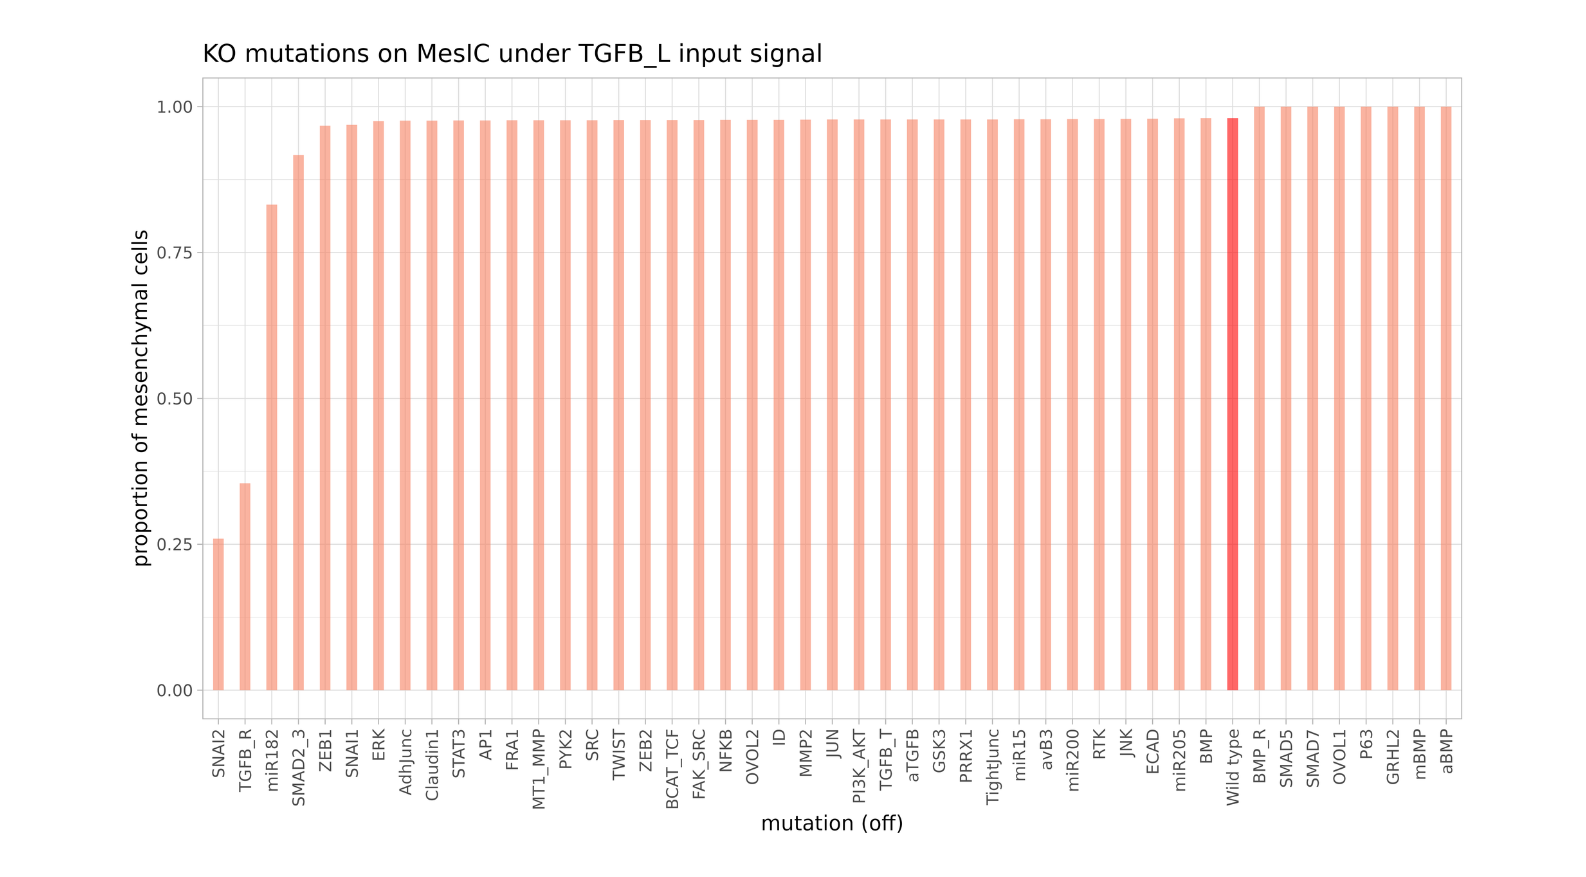


**Supplementary Figure 8**: **Mutations in MesIC generate distinct outcomes.** Inactivating mutations in MesIC with inputs (TGFB_L=1, BMP=0, GF=0), wild type is highlighted in red.


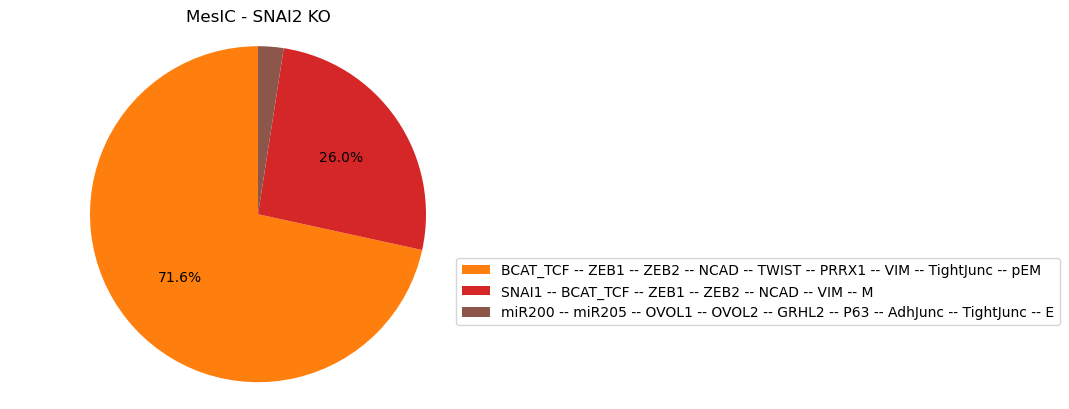


**Supplementary Figure 9:** Simulation of SNAI2 KO on MesIC under TGFB_L

**
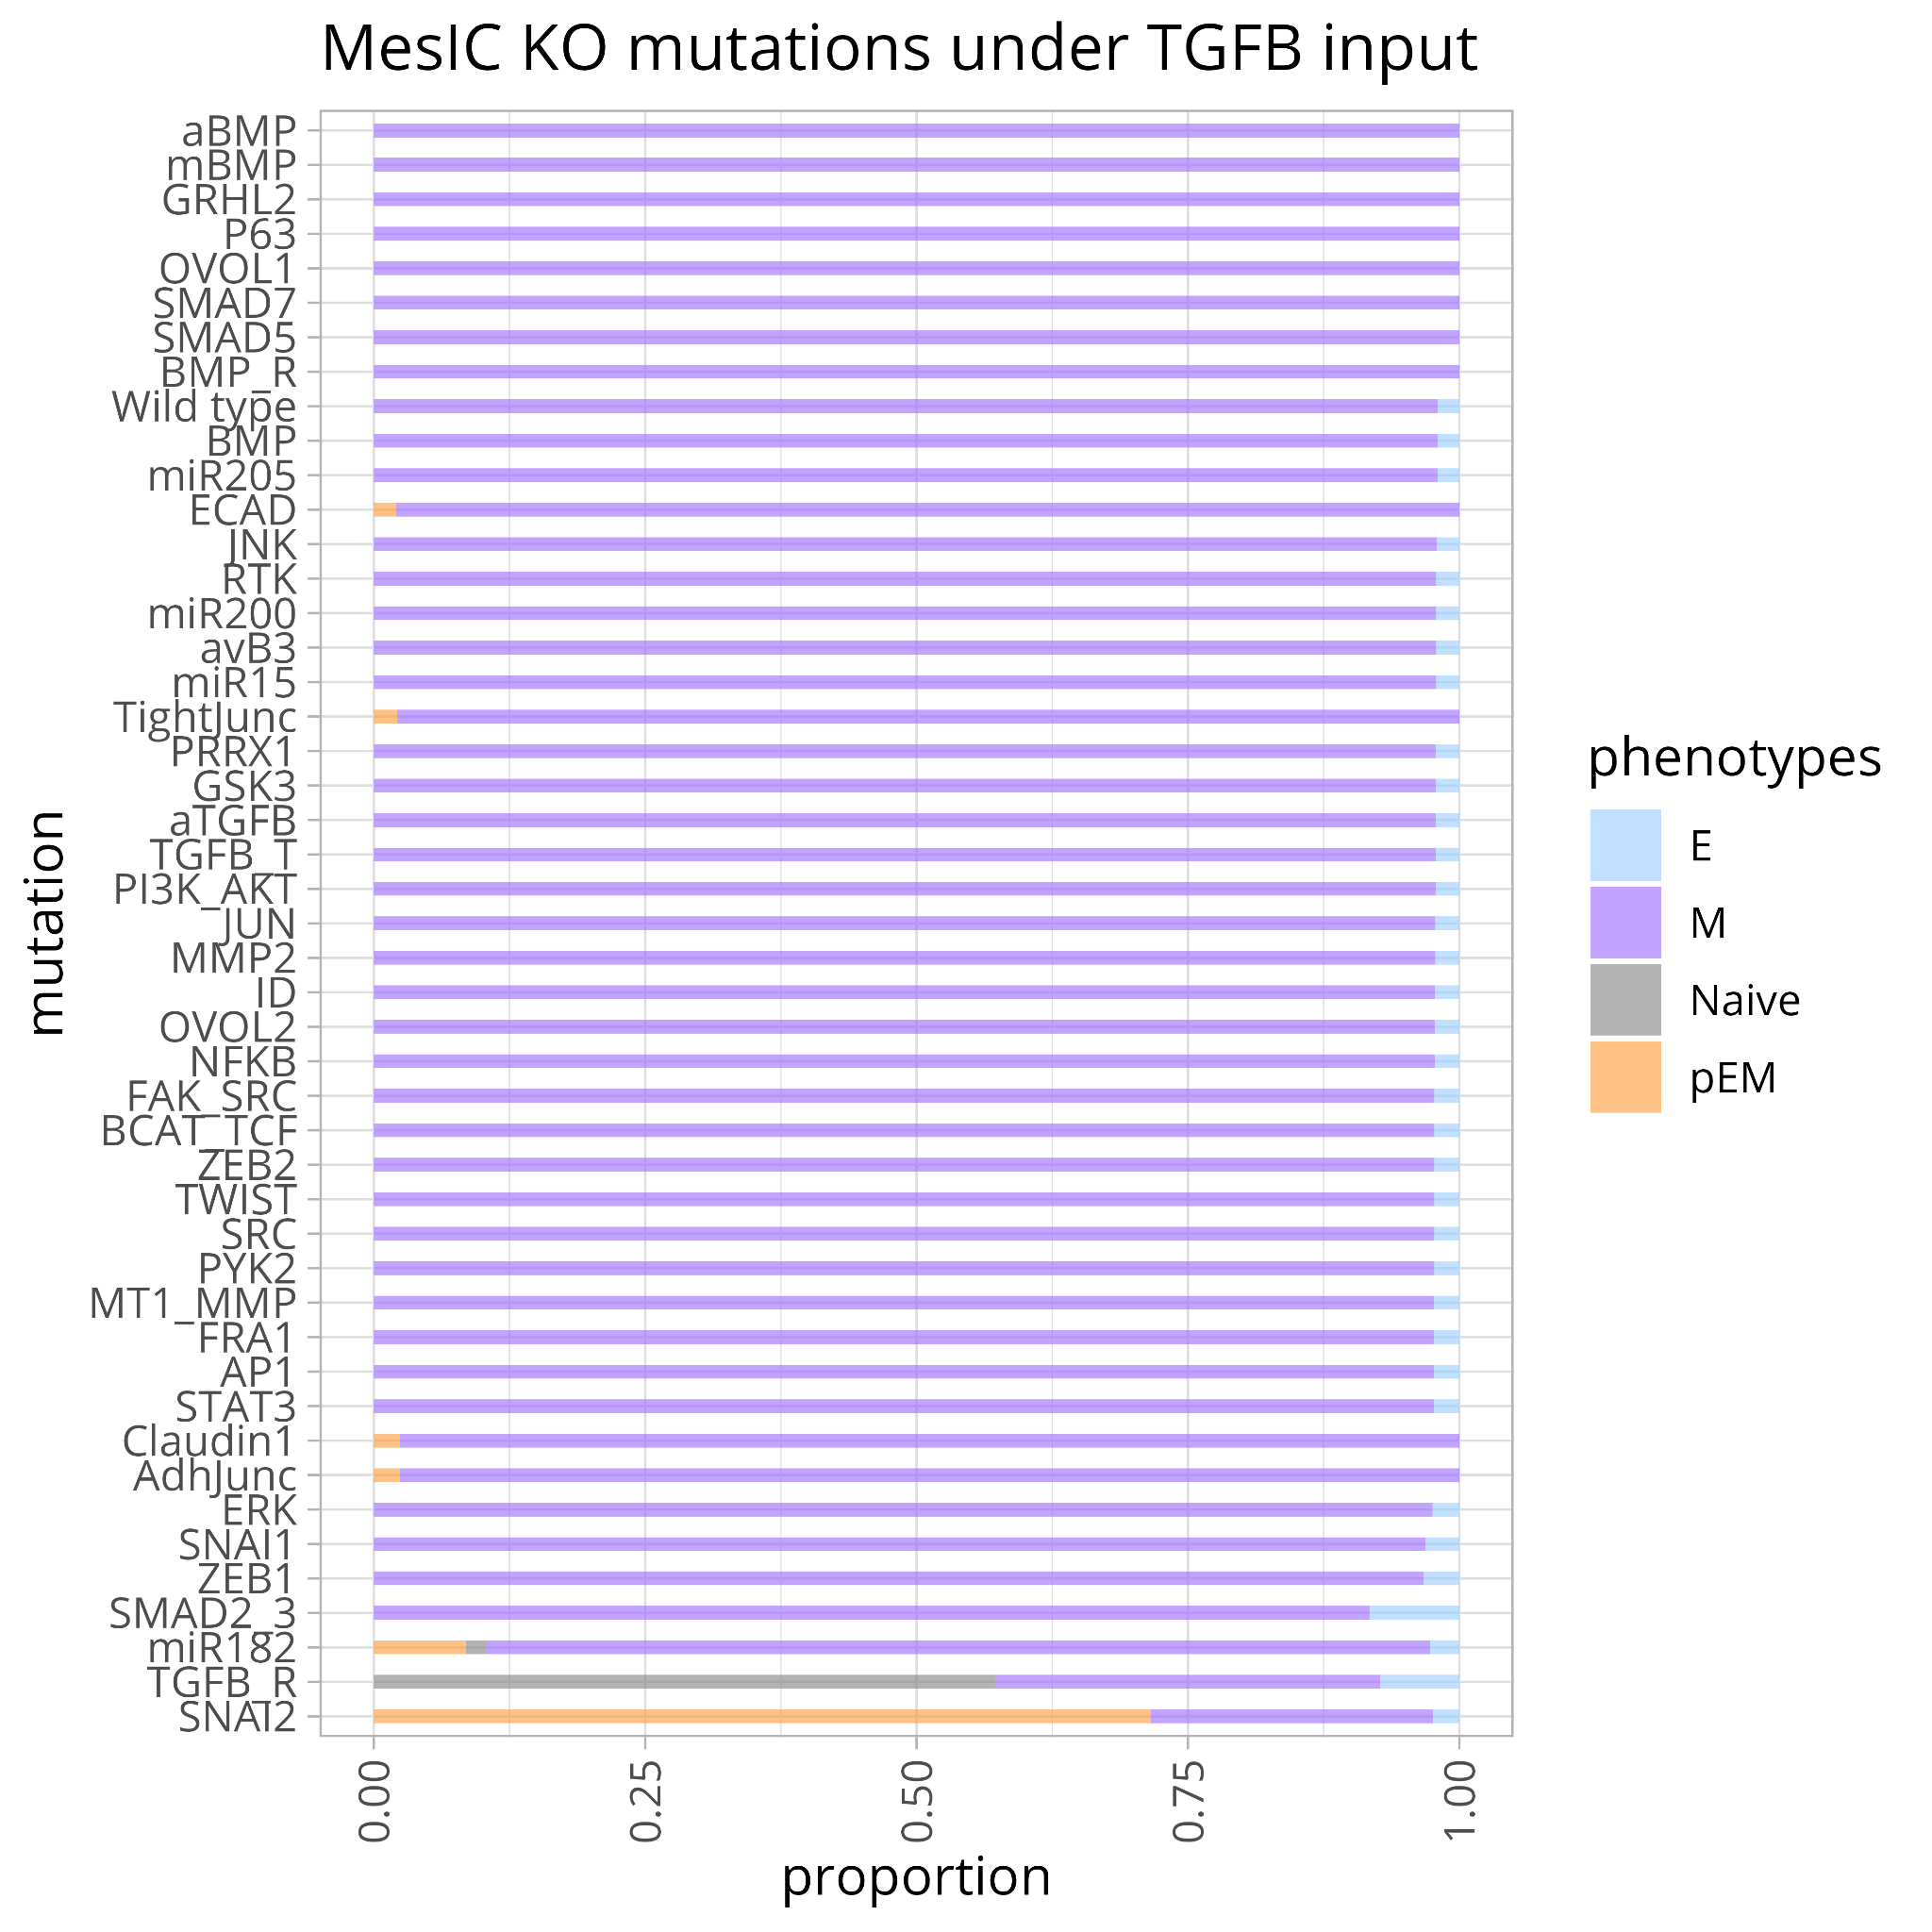
**

**Supplementary Figure 10.** Knockouts in MesIC with inputs (TGFB_L=1, BMP=0, GF=0) and their corresponding phenotype.

**References**

[1.](https://www.zotero.org/google-docs/?ZfU5e6) [Buijs, J. T. *et al.* Bone Morphogenetic Protein 7 in the Development and Treatment of Bone Metastases from Breast Cancer. *Cancer Res.* **67**, 8742–8751 (2007).](https://www.zotero.org/google-docs/?ZfU5e6)

[2.](https://www.zotero.org/google-docs/?ZfU5e6) [Pattabiraman, D. R. *et al.* Activation of PKA leads to mesenchymal-to-epithelial transition and loss of tumor-initiating ability. *Science* **351**, aad3680 (2016).](https://www.zotero.org/google-docs/?ZfU5e6)

[3.](https://www.zotero.org/google-docs/?ZfU5e6) [Esposito, M. *et al.* Bone vascular niche E-selectin induces mesenchymal–epithelial transition and Wnt activation in cancer cells to promote bone metastasis. *Nat. Cell Biol.* **21**, 627–639 (2019).](https://www.zotero.org/google-docs/?ZfU5e6)

[4.](https://www.zotero.org/google-docs/?ZfU5e6) [del Pozo Martin, Y. *et al.* Mesenchymal Cancer Cell-Stroma Crosstalk Promotes Niche Activation, Epithelial Reversion, and Metastatic Colonization. *Cell Rep.* **13**, 2456–2469 (2015).](https://www.zotero.org/google-docs/?ZfU5e6)

[5.](https://www.zotero.org/google-docs/?ZfU5e6) [Gao, D. *et al.* Myeloid Progenitor Cells in the Premetastatic Lung Promote Metastases by Inducing Mesenchymal to Epithelial Transition. *Cancer Res.* **72**, 1384–1394 (2012).](https://www.zotero.org/google-docs/?ZfU5e6)

[6.](https://www.zotero.org/google-docs/?ZfU5e6) [Chang, C.-C. *et al.* Connective Tissue Growth Factor Activates Pluripotency Genes and Mesenchymal–Epithelial Transition in Head and Neck Cancer Cells. *Cancer Res.* **73**, 4147–4157 (2013).](https://www.zotero.org/google-docs/?ZfU5e6)

[7.](https://www.zotero.org/google-docs/?ZfU5e6) [Karamanou, K. *et al.* Lumican effectively regulates the estrogen receptors-associated functional properties of breast cancer cells, expression of matrix effectors and epithelial-to-mesenchymal transition. *Sci. Rep.* **7**, 45138 (2017).](https://www.zotero.org/google-docs/?ZfU5e6)

[8.](https://www.zotero.org/google-docs/?ZfU5e6) [Yates, C. C., Shepard, C. R., Stolz, D. B. & Wells, A. Co-culturing human prostate carcinoma cells with hepatocytes leads to increased expression of E-cadherin. *Br. J. Cancer* **96**, 1246–1252 (2007).](https://www.zotero.org/google-docs/?ZfU5e6)

[9.](https://www.zotero.org/google-docs/?ZfU5e6) [Chang, C.-J. *et al.* p53 regulates epithelial–mesenchymal transition and stem cell properties through modulating miRNAs. *Nat. Cell Biol.* **13**, 317–323 (2011).](https://www.zotero.org/google-docs/?ZfU5e6)

[10.](https://www.zotero.org/google-docs/?ZfU5e6) [Korpal, M., Lee, E. S., Hu, G. & Kang, Y. The miR-200 Family Inhibits Epithelial-Mesenchymal Transition and Cancer Cell Migration by Direct Targeting of E-cadherin Transcriptional Repressors ZEB1 and ZEB2*. *J. Biol. Chem.* **283**, 14910–14914 (2008).](https://www.zotero.org/google-docs/?ZfU5e6)

[11.](https://www.zotero.org/google-docs/?ZfU5e6) [Tran, M. N. *et al.* The p63 Protein Isoform ΔNp63α Inhibits Epithelial-Mesenchymal Transition in Human Bladder Cancer Cells. *J. Biol. Chem.* **288**, 3275–3288 (2013).](https://www.zotero.org/google-docs/?ZfU5e6)

[12.](https://www.zotero.org/google-docs/?ZfU5e6) [Cieply, B. *et al.* Suppression of the Epithelial–Mesenchymal Transition by Grainyhead-like-2. *Cancer Res.* **72**, 2440–2453 (2012).](https://www.zotero.org/google-docs/?ZfU5e6)

[13.](https://www.zotero.org/google-docs/?ZfU5e6) [Roca, H. *et al.* Transcription Factors OVOL1 and OVOL2 Induce the Mesenchymal to Epithelial Transition in Human Cancer. *PLOS ONE* **8**, e76773 (2013).](https://www.zotero.org/google-docs/?ZfU5e6)

[14.](https://www.zotero.org/google-docs/?ZfU5e6) [Watanabe, K. *et al.* Mammary Morphogenesis and Regeneration Require the Inhibition of EMT at Terminal End Buds by Ovol2 Transcriptional Repressor. *Dev. Cell* **29**, 59–74 (2014).](https://www.zotero.org/google-docs/?ZfU5e6)

[15.](https://www.zotero.org/google-docs/?ZfU5e6) [Chakrabarti, R. *et al.* Elf5 inhibits the epithelial–mesenchymal transition in mammary gland development and breast cancer metastasis by transcriptionally repressing Snail2. *Nat. Cell Biol.* **14**, 1212–1222 (2012).](https://www.zotero.org/google-docs/?ZfU5e6)

[16.](https://www.zotero.org/google-docs/?ZfU5e6) [Yori, J. L., Johnson, E., Zhou, G., Jain, M. K. & Keri, R. A. Krüppel-like Factor 4 Inhibits Epithelial-to-Mesenchymal Transition through Regulation of E-cadherin Gene Expression *. *J. Biol. Chem.* **285**, 16854–16863 (2010).](https://www.zotero.org/google-docs/?ZfU5e6)

[17.](https://www.zotero.org/google-docs/?ZfU5e6) [Sun, R. *et al.* FBXO22 Possesses Both Protumorigenic and Antimetastatic Roles in Breast Cancer Progression. *Cancer Res.* **78**, 5274–5286 (2018).](https://www.zotero.org/google-docs/?ZfU5e6)

[18.](https://www.zotero.org/google-docs/?ZfU5e6) [Sakamoto, K. *et al.* EHF suppresses cancer progression by inhibiting ETS1-mediated ZEB expression. *Oncogenesis* **10**, 1–15 (2021).](https://www.zotero.org/google-docs/?ZfU5e6)

[19.](https://www.zotero.org/google-docs/?ZfU5e6) [Wang, Z. *et al.* CKB inhibits epithelial-mesenchymal transition and prostate cancer progression by sequestering and inhibiting AKT activation. *Neoplasia* **23**, 1147–1165 (2021).](https://www.zotero.org/google-docs/?ZfU5e6)

[20.](https://www.zotero.org/google-docs/?ZfU5e6) [Kong, J. *et al.* Long non-coding RNA LINC01133 inhibits epithelial–mesenchymal transition and metastasis in colorectal cancer by interacting with SRSF6. *Cancer Lett.* **380**, 476–484 (2016).](https://www.zotero.org/google-docs/?ZfU5e6)

[21.](https://www.zotero.org/google-docs/?ZfU5e6) [Bhat, A. A. *et al.* Claudin-7 expression induces mesenchymal to epithelial transformation (MET) to inhibit colon tumorigenesis. *Oncogene* **34**, 4570–4580 (2015).](https://www.zotero.org/google-docs/?ZfU5e6)

[22.](https://www.zotero.org/google-docs/?ZfU5e6) [Stankic, M. *et al.* TGF-β-Id1 Signaling Opposes Twist1 and Promotes Metastatic Colonization via a Mesenchymal-to-Epithelial Transition. *Cell Rep.* **5**, 1228–1242 (2013).](https://www.zotero.org/google-docs/?ZfU5e6)

[23.](https://www.zotero.org/google-docs/?ZfU5e6) [Lourenço, A. R. *et al.* C/EBPɑ is crucial determinant of epithelial maintenance by preventing epithelial-to-mesenchymal transition. *Nat. Commun.* **11**, 785 (2020).](https://www.zotero.org/google-docs/?ZfU5e6)

[24.](https://www.zotero.org/google-docs/?ZfU5e6) [Higashikawa, K. *et al.* Snail-Induced Down-Regulation of ΔNp63α Acquires Invasive Phenotype of Human Squamous Cell Carcinoma. *Cancer Res.* **67**, 9207–9213 (2007).](https://www.zotero.org/google-docs/?ZfU5e6)

[25.](https://www.zotero.org/google-docs/?ZfU5e6) [Chou, J. *et al.* GATA3 suppresses metastasis and modulates the tumour microenvironment by regulating microRNA-29b expression. *Nat. Cell Biol.* **15**, 201–213 (2013).](https://www.zotero.org/google-docs/?ZfU5e6)

[26.](https://www.zotero.org/google-docs/?ZfU5e6) [Takaishi, M., Tarutani, M., Takeda, J. & Sano, S. Mesenchymal to Epithelial Transition Induced by Reprogramming Factors Attenuates the Malignancy of Cancer Cells. *PLOS ONE* **11**, e0156904 (2016).](https://www.zotero.org/google-docs/?ZfU5e6)

[27.](https://www.zotero.org/google-docs/?ZfU5e6) [Kumarswamy, R. *et al.* MicroRNA-30a inhibits epithelial-to-mesenchymal transition by targeting Snai1 and is downregulated in non-small cell lung cancer. *Int. J. Cancer* **130**, 2044–2053 (2012).](https://www.zotero.org/google-docs/?ZfU5e6)

[28.](https://www.zotero.org/google-docs/?ZfU5e6) [Liu, Z. *et al.* RUNX3 regulates vimentin expression via miR-30a during epithelial–mesenchymal transition in gastric cancer cells. *J. Cell. Mol. Med.* **18**, 610–623 (2014).](https://www.zotero.org/google-docs/?ZfU5e6)

[29.](https://www.zotero.org/google-docs/?ZfU5e6) [Price, L. S. *et al.* Rap1 Regulates E-cadherin-mediated Cell-Cell Adhesion*. *J. Biol. Chem.* **279**, 35127–35132 (2004).](https://www.zotero.org/google-docs/?ZfU5e6)

[30.](https://www.zotero.org/google-docs/?ZfU5e6) [Takano, S. *et al.* Prrx1 isoform switching regulates pancreatic cancer invasion and metastatic colonization. *Genes Dev.* **30**, 233–247 (2016).](https://www.zotero.org/google-docs/?ZfU5e6)

[31.](https://www.zotero.org/google-docs/?ZfU5e6) [Galliher, A. J. & Schiemann, W. P. β3Integrin and Src facilitate transforming growth factor-β mediated induction of epithelial-mesenchymal transition in mammary epithelial cells. *Breast Cancer Res.* **8**, R42 (2006).](https://www.zotero.org/google-docs/?ZfU5e6)

[32.](https://www.zotero.org/google-docs/?ZfU5e6) [Wendt, M. K. & Schiemann, W. P. Therapeutic targeting of the focal adhesion complex prevents oncogenic TGF-β signaling and metastasis. *Breast Cancer Res.* **11**, R68 (2009).](https://www.zotero.org/google-docs/?ZfU5e6)

[33.](https://www.zotero.org/google-docs/?ZfU5e6) [Galliher, A. J. & Schiemann, W. P. Src Phosphorylates Tyr284 in TGF-β Type II Receptor and Regulates TGF-β Stimulation of p38 MAPK during Breast Cancer Cell Proliferation and Invasion. *Cancer Res.* **67**, 3752–3758 (2007).](https://www.zotero.org/google-docs/?ZfU5e6)

[34.](https://www.zotero.org/google-docs/?ZfU5e6) [Wendt, M. K. *et al.* TGF-β stimulates Pyk2 expression as part of an epithelial-mesenchymal transition program required for metastatic outgrowth of breast cancer. *Oncogene* **32**, 2005–2015 (2013).](https://www.zotero.org/google-docs/?ZfU5e6)

[35.](https://www.zotero.org/google-docs/?ZfU5e6) [Sinh, N. D., Endo, K., Miyazawa, K. & Saitoh, M. Ets1 and ESE1 reciprocally regulate expression of ZEB1/ZEB2, dependent on ERK1/2 activity, in breast cancer cells. *Cancer Sci.* **108**, 952–960 (2017).](https://www.zotero.org/google-docs/?ZfU5e6)

[36.](https://www.zotero.org/google-docs/?ZfU5e6) [Zhou, B. P. *et al.* Dual regulation of Snail by GSK-3β-mediated phosphorylation in control of epithelial–mesenchymal transition. *Nat. Cell Biol.* **6**, 931–940 (2004).](https://www.zotero.org/google-docs/?ZfU5e6)

[37.](https://www.zotero.org/google-docs/?ZfU5e6) [Kao, S.-H. *et al.* GSK3β controls epithelial–mesenchymal transition and tumor metastasis by CHIP-mediated degradation of Slug. *Oncogene* **33**, 3172–3182 (2014).](https://www.zotero.org/google-docs/?ZfU5e6)

[38.](https://www.zotero.org/google-docs/?ZfU5e6) [Gonzalez, D. M. & Medici, D. Signaling mechanisms of the epithelial-mesenchymal transition. *Sci. Signal.* **7**, re8–re8 (2014).](https://www.zotero.org/google-docs/?ZfU5e6)

[39.](https://www.zotero.org/google-docs/?ZfU5e6) [Ding, Q. *et al.* Erk Associates with and Primes GSK-3β for Its Inactivation Resulting in Upregulation of β-Catenin. *Mol. Cell* **19**, 159–170 (2005).](https://www.zotero.org/google-docs/?ZfU5e6)

[40.](https://www.zotero.org/google-docs/?ZfU5e6) [Sánchez-Tilló, E. *et al.* β-catenin/TCF4 complex induces the epithelial-to-mesenchymal transition (EMT)-activator ZEB1 to regulate tumor invasiveness. *Proc. Natl. Acad. Sci.* **108**, 19204–19209 (2011).](https://www.zotero.org/google-docs/?ZfU5e6)

[41.](https://www.zotero.org/google-docs/?ZfU5e6) [Gilles, C. *et al.* Transactivation of vimentin by beta-catenin in human breast cancer cells. *Cancer Res.* **63**, 2658–2664 (2003).](https://www.zotero.org/google-docs/?ZfU5e6)

[42.](https://www.zotero.org/google-docs/?ZfU5e6) [Clark, I. M., Swingler, T. E., Sampieri, C. L. & Edwards, D. R. The regulation of matrix metalloproteinases and their inhibitors. *Int. J. Biochem. Cell Biol.* **40**, 1362–1378 (2008).](https://www.zotero.org/google-docs/?ZfU5e6)

[43.](https://www.zotero.org/google-docs/?ZfU5e6) [Hlubek, F., Spaderna, S., Jung, A., Kirchner, T. & Brabletz, T. β-Catenin activates a coordinated expression of the proinvasive factors laminin-5 γ2 chain and MT1-MMP in colorectal carcinomas. *Int. J. Cancer* **108**, 321–326 (2004).](https://www.zotero.org/google-docs/?ZfU5e6)

[44.](https://www.zotero.org/google-docs/?ZfU5e6) [Addison, J. B. *et al.* Functional Hierarchy and Cooperation of EMT Master Transcription Factors in Breast Cancer Metastasis. *Mol. Cancer Res.* **19**, 784–798 (2021).](https://www.zotero.org/google-docs/?ZfU5e6)

[45.](https://www.zotero.org/google-docs/?ZfU5e6) [Su, J. *et al.* MicroRNA-200a suppresses the Wnt/β-catenin signaling pathway by interacting with β-catenin. *Int. J. Oncol.* **40**, 1162–1170 (2012).](https://www.zotero.org/google-docs/?ZfU5e6)

[46.](https://www.zotero.org/google-docs/?ZfU5e6) [Pires, B. R. B. *et al.* NF-kappaB Is Involved in the Regulation of EMT Genes in Breast Cancer Cells. *PLOS ONE* **12**, e0169622 (2017).](https://www.zotero.org/google-docs/?ZfU5e6)

[47.](https://www.zotero.org/google-docs/?ZfU5e6) [Bakiri, L. *et al.* Fra-1/AP-1 induces EMT in mammary epithelial cells by modulating Zeb1/2 and TGFβ expression. *Cell Death Differ.* **22**, 336–350 (2015).](https://www.zotero.org/google-docs/?ZfU5e6)

[48.](https://www.zotero.org/google-docs/?ZfU5e6) [Shin, S., Dimitri, C. A., Yoon, S.-O., Dowdle, W. & Blenis, J. ERK2, but not ERK1, induces epithelial to mesenchymal transformation via DEF motif dependent signaling events. *Mol. Cell* **38**, 114 (2010).](https://www.zotero.org/google-docs/?ZfU5e6)

[49.](https://www.zotero.org/google-docs/?ZfU5e6) [Zhan, T., Rindtorff, N. & Boutros, M. Wnt signaling in cancer. *Oncogene* **36**, 1461–1473 (2017).](https://www.zotero.org/google-docs/?ZfU5e6)

[50.](https://www.zotero.org/google-docs/?ZfU5e6) [Shin, S. *et al.* ERK2 regulates epithelial-to-mesenchymal plasticity through DOCK10-dependent Rac1/FoxO1 activation. *Proc. Natl. Acad. Sci.* **116**, 2967–2976 (2019).](https://www.zotero.org/google-docs/?ZfU5e6)

[51.](https://www.zotero.org/google-docs/?ZfU5e6) [Moitrier, S. *et al.* Local light-activation of the Src oncoprotein in an epithelial monolayer promotes collective extrusion. *Commun. Phys.* **2**, 1–11 (2019).](https://www.zotero.org/google-docs/?ZfU5e6)

[52.](https://www.zotero.org/google-docs/?ZfU5e6) [Saha, T. & Gil-Henn, H. Invadopodia, a Kingdom of Non-Receptor Tyrosine Kinases. *Cells* **10**, 2037 (2021).](https://www.zotero.org/google-docs/?ZfU5e6)

[53.](https://www.zotero.org/google-docs/?ZfU5e6) [Gil-Henn, H., Girault, J.-A. & Lev, S. PYK2, a hub of signaling networks in breast cancer progression. *Trends Cell Biol.* https://doi.org/10.1016/j.tcb.2023.07.006 (2023) doi:10.1016/j.tcb.2023.07.006.](https://www.zotero.org/google-docs/?ZfU5e6)

[54.](https://www.zotero.org/google-docs/?ZfU5e6) [Destaing, O., Block, M. R., Planus, E. & Albiges-Rizo, C. Invadosome regulation by adhesion signaling. *Curr. Opin. Cell Biol.* **23**, 597–606 (2011).](https://www.zotero.org/google-docs/?ZfU5e6)

[55.](https://www.zotero.org/google-docs/?ZfU5e6) [Cooper, J. & Giancotti, F. G. Integrin Signaling in Cancer: Mechanotransduction, Stemness, Epithelial Plasticity, and Therapeutic Resistance. *Cancer Cell* **35**, 347–367 (2019).](https://www.zotero.org/google-docs/?ZfU5e6)

[56.](https://www.zotero.org/google-docs/?ZfU5e6) [Verma, N. *et al.* PYK2 sustains endosomal-derived receptor signalling and enhances epithelial-to-mesenchymal transition. *Nat. Commun.* **6**, 6064 (2015).](https://www.zotero.org/google-docs/?ZfU5e6)

[57.](https://www.zotero.org/google-docs/?ZfU5e6) [Ortiz, M. A. *et al.* Src family kinases, adaptor proteins and the actin cytoskeleton in epithelial-to-mesenchymal transition. *Cell Commun. Signal.* **19**, 67 (2021).](https://www.zotero.org/google-docs/?ZfU5e6)

[58.](https://www.zotero.org/google-docs/?ZfU5e6) [Yakymovych, I., Yakymovych, M., Hamidi, A., Landström, M. & Heldin, C.-H. The type II TGF-β receptor phosphorylates Tyr182 in the type I receptor to activate downstream Src signaling. *Sci. Signal.* **15**, eabp9521 (2022).](https://www.zotero.org/google-docs/?ZfU5e6)

[59.](https://www.zotero.org/google-docs/?ZfU5e6) [Noshita, S. *et al.* A TGF-β-responsive enhancer regulates SRC expression and epithelial–mesenchymal transition-associated cell migration. *J. Cell Sci.* **136**, jcs261001 (2023).](https://www.zotero.org/google-docs/?ZfU5e6)

[60.](https://www.zotero.org/google-docs/?ZfU5e6) [Eckert, M. A. *et al.* Twist1-Induced Invadopodia Formation Promotes Tumor Metastasis. *Cancer Cell* **19**, 372–386 (2011).](https://www.zotero.org/google-docs/?ZfU5e6)

[61.](https://www.zotero.org/google-docs/?ZfU5e6) [Lo, H.-W. *et al.* Epidermal Growth Factor Receptor Cooperates with Signal Transducer and Activator of Transcription 3 to Induce Epithelial-Mesenchymal Transition in Cancer Cells via Up-regulation of TWIST Gene Expression. *Cancer Res.* **67**, 9066–9076 (2007).](https://www.zotero.org/google-docs/?ZfU5e6)

[62.](https://www.zotero.org/google-docs/?ZfU5e6) [Wendt, M. K., Balanis, N., Carlin, C. R. & Schiemann, W. P. STAT3 and epithelial–mesenchymal transitions in carcinomas. *JAK-STAT* **3**, e28975 (2014).](https://www.zotero.org/google-docs/?ZfU5e6)
