# Supplementary material for: Mesenchymal to Epithelial Transition (MET) in Cancer Progression: Insights from logical modeling
Source: Research Square preprint supplement (doi:10.21203/rs.3.rs-8386357/v1), 2025-12-30
Supplement: Supplementary file 2 [file 3daf8ea0d9bf66f0ecec09de.xlsx]

## Sheet: logical rules (model)
node	rule	Rationale
ZEB1	(ERK | SNAI1 | AP1 | BCAT_TCF) & !miR200 & !miR205 & !OVOL1 & !OVOL2 & !GRHL2	Activation: Direct binding of Bcat/TCF4 (Sánchez-Tilló 2011), downstream of ERK (Sinh 2017), SNAI1 (Dave 2011). Repression: direct by miR200 (Korpal 2008), miR205 (Tran 2013), OVOL2 (Roca 2013), OVOL1 (Xu 2019), GRHL2 (Cieply 2012)
ZEB2	(NFKB | AP1) & !miR200 & !miR205 & !OVOL2	Activation: Fra1/AP1 direct binding to the promoter(Bakiri 2015), direct binding of NFkB (Pires 2017) . Repression: direct by miR200 (Korpal 2008), miR205 (Tran 2013). OVOL2 has been shown to directly repress ZEB2 in non-cancer systems by binding to its promoter (Watanabe 2014, Kitazawa 2016) and OVOL2 induction causes ZEB2 is inhibition (Watanabe 2014, Roca 2013)
NCAD	ZEB1 | ZEB2	ZEB1 or ZEB2 induce Ncad (Addison 2021)
TWIST	(NFKB | STAT3) & !SNAI1 &!ID &!OVOL2	Activation: Direct binding of NFkB (Pires 2017) and STAT3 (Lo 2007). Repression: ID inhibtion of TWIST1 (Peinado 2007). SNAI1 direct binding (Tran 2013), OVOL2 direct binding (Wang 2017)
miR15	PRRX1	PRRX1 induces miR15 (Fazilaty 2019)
SNAI1	(SMAD2_3 & ERK) & !miR15 & !GSK3	TGFB-SMAD (Thuault 2008) cooperation with MAPK-activated RREB1 (Su 2020). GSK3 inhibition of SNAI1 (Zhou 2004), miR15 represses SNAI1 (Fazilaty 2019)
PRRX1	TGFB_R & !SNAI1	PRRX1 is induced under BMP2 or TGFB1 (Ocana 2012), direct repression by SNAI1 (Fazilaty 2019)
SNAI2	(NFKB | SMAD2_3 | TWIST) & !GSK3 & !miR200	Direct bidning by NFKB (Pires 2017), SMAD in cooperation with HMGA2 (Li 2014), TWIST (Casas 2011). GS3K inhibitis SNAI2 (Kao 2014), miR200 inhibits SNAI2 (Addison 2021)
SMAD2_3	TGFB_R	canonical pathway
miR182	SMAD2_3	TGFB induces miR182 through SMAD pathway (Yu 2016)
BMP_R	BMP | aBMP	ligand-receptor. aBMP represents autocrine signaling
SMAD5	BMP_R	canonical pathway
SMAD7	(SMAD2_3 & !miR182) | OVOL1	OVOL1 increases SMAD7 transcript and protein stabilization (Fan 2022). miR182 binds to SMAD7 transcript (Yu 2016)
OVOL1	SMAD5	OVOL1 is induced by BMP7 - SMAD1,5,8 signaling axis (Kowanetz 2004)
OVOL2	GRHL2 & !ZEB1	Direct binding to promoter by GRHL2 (Aue 2015, Wang 2023). ZEB1 inhibition (Roca 2013); direct interaction has been proven in mice (Hong 2015)
miR200	(GRHL2) & !(ZEB1 | ZEB2 | SNAI1| SNAI2 | TWIST)	Activation: direct binding by GRHL2 (Chung 2016). Repression: Direct by SNAI2 (Ding 2013), SNAI1 (Moes 2012), ZEB1/2 (Bracken 2008), TWIST1 (Wiklund 2011)
miR205	P63 & !TWIST	Direct activartion by p63 (Tran 2013). Repression: TWIST1 (Wiklund 2010)
BCAT_TCF	!AdhJunc & !GSK3 & !miR200	BCAT_TCF represents BCAT complex with TCF4. GSK3 inhibitis freed BCAT (Ding 2005). Perturbed Adherin Juncitons free Bcat_TCF4 to act as TF (Ortiz 2021). miR200 which represses both CTNBB1 and TCF4 (Addison 2021, Su 2012)
VIM	BCAT_TCF | ZEB2	Direct by ZEB2 (Nam 2012), and BCAT (Gilles 2003)
P63	GRHL2 & !SMAD2_3 & !SNAI1	GRHL2 directly induces p63 (Mehrazarin 2015). SMAD3 and SNAI1 inhibit CEPBa, an activator of P63 (Lourenco 2020, Higashikawa 2007)
GRHL2	P63 & !ZEB1	ZEB1 represses GRHL2 directly (Cieply 2013). GRHL2 and P63 form a positive feedback loop and the inhibition of one results in the inhibition of the other (Mehrazarin 2015); GRHL2 has been shown to be downregulated by p63 loss in diverse systems (Latil 2017, Yoh 2016).
NFKB	TGFB_R | PI3K_AKT	TAB1:TAK1:IKKβ:NF-κB signaling axis in malignant cells (Neil 2008) and by AKT (Julien 2007)
FRA1	ERK	Induced by ERK (Shin 2010)
JUN	JNK	canonical pathway
JNK	ERK|TGFB_R	ERK2 induced Dock10-Rac1-JNK signaling axis during EMT (Shin 2019). TGFBR-Dab2-TAK1 activates JNK signaling (Hocevar 2005)
AP1	FRA1 & JUN	Fra-1 dimerizes with Jun proteins to form the activator protein 1 (AP-1) TF (Bakiri 2015)
ID	SMAD5 & !SMAD2_3	Represent ID2 and ID3. TGFB inhibits and BMP induces in SMAD dependent manner (Kowanetz 2004)
Claudin1	!SNAI1 & !SNAI2	SNAI1/2 repress Claudin 1 (Martinez-Estrada 2006)
TightJunc	Claudin1	Claudin1 is a major component of Tight Junctions (Martinez-Estrada 2006)
PI3K_AKT	TGFB_R | RTK	TGFB1 treatment induces AKT and ERK pathways (Medici 2006). EGF(RTK) can induce AKT signaling independently of PYK2 activity (Verma 2015).
ERK	(PYK2 & SRC & RTK) | (FAK_SRC & TGFB_R)	TGFB needs SRC and FAK to activate ERK (because along with intergin B3 they mediate the binding to GRB2 to TGFBR which allows ERK activation) (Galliher 2007, Wendt 2009), while EGF(RTK) depens on PYK2 to activate ERK pathway and SRC is proposed to act upstream (Verma 2015).
STAT3	PYK2 | (RTK & SRC)	PYK2 induces STAT3 (Gil-Henn 2023); SCR dependent activation of EGFR (RTK) activates STAT3 (Wendt 2014)
PYK2	(TGFB_R & SRC & SMAD2_3) | (STAT3 & RTK)	TGFB induces PYK2 via SMAD and SRC (Wendt 2013). PYK2 forms a positive feedback loop through PYK2->STAT3->cMET(RTK)->PYK2 (Verma 2015)
SRC	TGFB_R | RTK	TGFB induces SRC (Yakymovych 2022). RTKs activate SRC (Eckert 2011, Zhao 2017)
FAK_SRC	SRC	SRC regulates FAK (Ortiz 2021)
RTK	GF | TWIST	General node for RTKs. Activated by GF inputs; TWIST can induce PDGFR AND ligand of PDGFR (Eckert 2011)
GF	GF	ligand.
MT1_MMP	BCAT_TCF	MT1-MMP is activated by Bcat-TCF4 (Hlubek 2004).
MMP2	(ZEB1 | TWIST)	ZEB1 induces MMP2 (Bae 2013); direct induction by TWIST (Lu 2018).
TGFB_T	AP1	Direct binding by Fra-AP1 (Bakiri 2015)
avB3	ZEB2 & !miR200	ZEB2 is proposed as a repressor and shown to bind to the promoter of aV integrin (Tang 2022). miR200 was shown to decrease cell surface expression of aVB3 integrin (Kariya 2021)
aTGFB	TGFB_T & (MT1_MMP | ( MMP2 & avB3))	MT1_MMP interact with av integrins to liberate TGFB1 ligand from its inactive form; proteases as MMP2 can also free TGFB1 (Mamuya 2012, Deng 2024). MT1-MMP is needed to activate MMP2 (Gifford 2019).
TGFB_L	TGFB_L	ligand
TGFB_R	(TGFB_L | aTGFB) & !SMAD7	ligand-receptor and autocrine signal. SMAD7 which destabilizes TGFBR (Fan 2022)
BMP	BMP	ligand.
mBMP	P63	P63 induces BMP7 expression (Balboni 2013)
aBMP	mBMP	autocrine BMP7 signal
GSK3	!ERK & !PI3K_AKT	AKT and ERK phosphorylate GSK3 and degrade it (Ding 2005)
ECAD	!SNAI1 & !SNAI2 & !ZEB1 & !ZEB2	EMT-TFs SNAI1, SNAI2, ZEB1 and ZEB2 suppress E-cadherin (Addison 2021, Gonzalez 2014)
AdhJunc	ECAD & !SRC	SRC can drive the phosphorylation and destabilization of Adherens Junction, formed by E-cadherin and Bcatenin (Ortiz 2021)
M	(TWIST | SNAI1 | SNAI2 | ZEB1 | ZEB2 | PRRX1 | BCAT_TCF) & !GRHL2 & !P63 & !miR200 & !miR205 & !OVOL1 & !OVOL2 & !AdhJunc & !TightJunc & NCAD & VIM	Absense of TightJunc (tight junctions), AdhJunc (adherin junctions), and the MET driver GRHL2, P63, miR200, miR205, OVOL1, or OVOL2, and the presense of N-cadherin (NCAD), Vimentin (VIM), and at least one of the EMT drivers TWIST, SNAI1, SNAI2, ZEB1, ZEB2, PRRX1, and BCAT-TCF
E	(GRHL2 | P63 | miR200 | miR205 | OVOL1 | OVOL2) & !TWIST & !SNAI1 & !SNAI2 & !ZEB1 & !ZEB2 & !PRRX1 & !BCAT_TCF & AdhJunc & TightJunc & !NCAD & !VIM )	Presense of TightJunc (tight junctions), AdhJunc (adherin junctions), and at least one MET driver GRHL2, P63, miR200, miR205, OVOL1, or OVOL2 and the absense of N-cadherin (NCAD), Vimentin (VIM), and the EMT drivers TWIST, SNAI1, SNAI2, ZEB1, ZEB2, PRRX1, and BCAT-TCF
P	(!E & !M & (TWIST | SNAI1 | SNAI2 | ZEB1 | ZEB2 | PRRX1 | BCAT_TCF | GRHL2 | P63 | miR200 | miR205 | OVOL1 | OVOL2))	Not E or M states and at least one EMT or MET factor
Naive	!E & !M & !pEM	Not E, M or pEM

## Sheet: References
REFERENCES
Sánchez-Tilló, E. et al. β-catenin/TCF4 complex induces the epithelial-to-mesenchymal transition (EMT)-activator ZEB1 to regulate tumor invasiveness. Proc. Natl. Acad. Sci. 108, 19204–19209 (2011)
Sinh, N. D., Endo, K., Miyazawa, K. & Saitoh, M. Ets1 and ESE1 reciprocally regulate expression of ZEB1/ZEB2, dependent on ERK1/2 activity, in breast cancer cells. Cancer Sci. 108, 952–960 (2017)
Dave, N. et al. Functional Cooperation between Snail1 and Twist in the Regulation of ZEB1 Expression during Epithelial to Mesenchymal Transition*. J. Biol. Chem. 286, 12024–12032 (2011)
Korpal, M., Lee, E. S., Hu, G. & Kang, Y. The miR-200 Family Inhibits Epithelial-Mesenchymal Transition and Cancer Cell Migration by Direct Targeting of E-cadherin Transcriptional Repressors ZEB1 and ZEB2*. J. Biol. Chem. 283, 14910–14914 (2008)
Tran, M. N. et al. The p63 Protein Isoform ΔNp63α Inhibits Epithelial-Mesenchymal Transition in Human Bladder Cancer Cells. J. Biol. Chem. 288, 3275–3288 (2013)
Roca, H. et al. Transcription Factors OVOL1 and OVOL2 Induce the Mesenchymal to Epithelial Transition in Human Cancer. PLOS ONE 8, e76773 (2013)
Xu C, et al. OVOL1 inhibits oral squamous cell carcinoma growth and metastasis by suppressing zinc finger E-box binding homeobox 1. Int J Clin Exp Pathol. 12, 2801–2808 (2019)
Cieply, B. et al. Suppression of the Epithelial–Mesenchymal Transition by Grainyhead-like-2. Cancer Res. 72, 2440–2453 (2012)
Bakiri, L. et al. Fra-1/AP-1 induces EMT in mammary epithelial cells by modulating Zeb1/2 and TGFβ expression. Cell Death Differ. 22, 336–350 (2015)
Pires, B. R. B. et al. NF-kappaB Is Involved in the Regulation of EMT Genes in Breast Cancer Cells. PLOS ONE 12, e0169622 (2017)
Watanabe, K. et al. Mammary Morphogenesis and Regeneration Require the Inhibition of EMT at Terminal End Buds by Ovol2 Transcriptional Repressor. Dev. Cell 29, 59–74 (2014)
Kitazawa, K et al. OVOL2 Maintains the Transcriptional Program of Human Corneal Epithelium by Suppressing Epithelial-to-Mesenchymal Transition. Cell reports 15, 1359–1368 (2016)
Addison, J. B. et al. Functional Hierarchy and Cooperation of EMT Master Transcription Factors in Breast Cancer Metastasis. Mol. Cancer Res. 19, 784–798 (2021)
Lo, H.-W. et al. Epidermal Growth Factor Receptor Cooperates with Signal Transducer and Activator of Transcription 3 to Induce Epithelial-Mesenchymal Transition in Cancer Cells via Up-regulation of TWIST Gene Expression. Cancer Res. 67, 9066–9076 (2007)
Peinado, H., Olmeda, D. & Cano, A. Snail, Zeb and bHLH factors in tumour progression: an alliance against the epithelial phenotype? Nat. Rev. Cancer 7, 415–428 (2007)
Wang, Z.-H. et al. Ovol2 gene inhibits the Epithelial-to-Mesenchymal Transition in lung adenocarcinoma by transcriptionally repressing Twist1. Gene 600, 1–8 (2017)
Fazilaty, H. et al. A gene regulatory network to control EMT programs in development and disease. Nat. Commun. 10, 5115 (2019)
Thuault, S. et al. HMGA2 and Smads Co-regulate SNAIL1 Expression during Induction of Epithelial-to-Mesenchymal Transition *. J. Biol. Chem. 283, 33437–33446 (2008)
Su, J. et al. TGF-β orchestrates fibrogenic and developmental EMTs via the RAS effector RREB1. Nature 577, 566–571 (2020)
Zhou, B. P. et al. Dual regulation of Snail by GSK-3β-mediated phosphorylation in control of epithelial–mesenchymal transition. Nat. Cell Biol. 6, 931–940 (2004)
Ocaña, O. H. et al. Metastatic Colonization Requires the Repression of the Epithelial-Mesenchymal Transition Inducer Prrx1. Cancer Cell 22, 709–724 (2012)
Li, Y. et al. HMGA2 induces transcription factor Slug expression to promote epithelial-to-mesenchymal transition and contributes to colon cancer progression. Cancer Lett. 355, 130–140 (2014)
Casas, E. et al. Snail2 is an Essential Mediator of Twist1-Induced Epithelial Mesenchymal Transition and Metastasis. Cancer Res. 71, 245–254 (2011)
Kao, S.-H. et al. GSK3β controls epithelial–mesenchymal transition and tumor metastasis by CHIP-mediated degradation of Slug. Oncogene 33, 3172–3182 (2014)
Yu, J. et al. MicroRNA-182 targets SMAD7 to potentiate TGFβ-induced epithelial-mesenchymal transition and metastasis of cancer cells. Nat. Commun. 7, 13884 (2016)
Fan, C. et al. OVOL1 inhibits breast cancer cell invasion by enhancing the degradation of TGF-β type I receptor. Signal Transduct. Target. Ther. 7, 1–18 (2022)
Kowanetz, M., Valcourt, U., Bergström, R., Heldin, C.-H. & Moustakas, A. Id2 and Id3 Define the Potency of Cell Proliferation and Differentiation Responses to Transforming Growth Factor β and Bone Morphogenetic Protein. Mol. Cell. Biol. 24, 4241–4254 (2004)
Aue, A. et al. A Grainyhead-Like 2/Ovo-Like 2 Pathway Regulates Renal Epithelial Barrier Function and Lumen Expansion. J. Am. Soc. Nephrol. JASN 26, 2704–2715 (2015)
Wang, Z. et al. GRHL2-controlled gene expression networks in luminal breast cancer. Cell Commun. Signal. 21, 15 (2023)
Hong, T. et al. An Ovol2-Zeb1 Mutual Inhibitory Circuit Governs Bidirectional and Multi-step Transition between Epithelial and Mesenchymal States. PLOS Comput. Biol. 11, e1004569 (2015)
Chung, V. Y. et al. GRHL2-miR-200-ZEB1 maintains the epithelial status of ovarian cancer through transcriptional regulation and histone modification. Sci. Rep. 6, 19943 (2016)
Ding, X., Park, S. I., McCauley, L. K. & Wang, C.-Y. Signaling between Transforming Growth Factor β (TGF-β) and Transcription Factor SNAI2 Represses Expression of MicroRNA miR-203 to Promote Epithelial-Mesenchymal Transition and Tumor Metastasis *. J. Biol. Chem. 288, 10241–10253 (2013).
Moes, M. et al. A Novel Network Integrating a miRNA-203/SNAI1 Feedback Loop which Regulates Epithelial to Mesenchymal Transition. PLoS ONE 7, e35440 (2012)
Bracken, C. P. et al. A Double-Negative Feedback Loop between ZEB1-SIP1 and the microRNA-200 Family Regulates Epithelial-Mesenchymal Transition. Cancer Res. 68, 7846–7854 (2008)
Wiklund, E. D. et al. Coordinated epigenetic repression of the miR-200 family and miR-205 in invasive bladder cancer. Int. J. Cancer 128, 1327–1334 (2011)
Ding, Q. et al. Erk Associates with and Primes GSK-3β for Its Inactivation Resulting in Upregulation of β-Catenin. Mol. Cell 19, 159–170 (2005)
Ortiz, M. A. et al. Src family kinases, adaptor proteins and the actin cytoskeleton in epithelial-to-mesenchymal transition. Cell Commun. Signal. 19, 67 (2021)
Su, J. et al. MicroRNA-200a suppresses the Wnt/β-catenin signaling pathway by interacting with β-catenin. Int. J. Oncol. 40, 1162–1170 (2012)
Nam, E.-H., Lee, Y., Park, Y.-K., Lee, J. W. & Kim, S. ZEB2 upregulates integrin α5 expression through cooperation with Sp1 to induce invasion during epithelial–mesenchymal transition of human cancer cells. Carcinogenesis 33, 563–571 (2012)
Gilles, C. et al. Transactivation of vimentin by beta-catenin in human breast cancer cells. Cancer Res. 63, 2658–2664 (2003)
Mehrazarin, S. et al. The p63 Gene Is Regulated by Grainyhead-like 2 (GRHL2) through Reciprocal Feedback and Determines the Epithelial Phenotype in Human Keratinocytes *. J. Biol. Chem. 290, 19999–20008 (2015)
Lourenço, A. R. et al. C/EBPɑ is crucial determinant of epithelial maintenance by preventing epithelial-to-mesenchymal transition. Nat. Commun. 11, 785 (2020)
Higashikawa, K. et al. Snail-Induced Down-Regulation of ΔNp63α Acquires Invasive Phenotype of Human Squamous Cell Carcinoma. Cancer Res. 67, 9207–9213 (2007)
Cieply, B., Farris, J., Denvir, J., Ford, H. L. & Frisch, S. M. Epithelial–Mesenchymal Transition and Tumor Suppression Are Controlled by a Reciprocal Feedback Loop between ZEB1 and Grainyhead-like-2. Cancer Res. 73, 6299–6309 (2013)
Latil, M. et al. Cell-Type-Specific Chromatin States Differentially Prime Squamous Cell Carcinoma Tumor-Initiating Cells for Epithelial to Mesenchymal Transition. Cell Stem Cell 20, 191-204.e5 (2017).
Yoh, K. E. et al. Repression of p63 and induction of EMT by mutant Ras in mammary epithelial cells. Proc. Natl. Acad. Sci. 113, E6107–E6116 (2016).
Neil, J. R. & Schiemann, W. P. Altered TAB1:IκB Kinase Interaction Promotes Transforming Growth Factor β–Mediated Nuclear Factor-κB Activation during Breast Cancer Progression. Cancer Res. 68, 1462–1470 (2008).
Julien, S. et al. Activation of NF-κB by Akt upregulates Snail expression and induces epithelium mesenchyme transition. Oncogene 26, 7445–7456 (2007).
Shin, S., Dimitri, C. A., Yoon, S.-O., Dowdle, W. & Blenis, J. ERK2, but not ERK1, induces epithelial to mesenchymal transformation via DEF motif dependent signaling events. Mol. Cell 38, 114 (2010)
Shin, S. et al. ERK2 regulates epithelial-to-mesenchymal plasticity through DOCK10-dependent Rac1/FoxO1 activation. Proc. Natl. Acad. Sci. 116, 2967–2976 (2019)
Hocevar, B. A., Prunier, C. & Howe, P. H. Disabled-2 (Dab2) Mediates Transforming Growth Factor β(TGFβ)-stimulated Fibronectin Synthesis through TGFβ-activatedKinase 1 and Activation of the JNKPathway*. J. Biol. Chem. 280, 25920–25927 (2005).
Bakiri, L. et al. Fra-1/AP-1 induces EMT in mammary epithelial cells by modulating Zeb1/2 and TGFβ expression. Cell Death Differ. 22, 336–350 (2015)
Martínez-Estrada, O. M. et al. The transcription factors Slug and Snail act as repressors of Claudin-1 expression in epithelial cells. Biochem. J. 394, 449–457 (2006)
Medici, D, et al. Cooperation between snail and LEF-1 transcription factors is essential for TGF-beta1-induced epithelial-mesenchymal transition. Molecular biology of the cell. 17,1871-1879 (2006)
Galliher, A. J. & Schiemann, W. P. Src Phosphorylates Tyr284 in TGF-β Type II Receptor and Regulates TGF-β Stimulation of p38 MAPK during Breast Cancer Cell Proliferation and Invasion. Cancer Res. 67, 3752–3758 (2007)
Wendt, M. K. & Schiemann, W. P. Therapeutic targeting of the focal adhesion complex prevents oncogenic TGF-β signaling and metastasis. Breast Cancer Res. 11, R68 (2009)
Verma, N. et al. PYK2 sustains endosomal-derived receptor signalling and enhances epithelial-to-mesenchymal transition. Nat. Commun. 6, 6064 (2015)
Gil-Henn, H., Girault, J.-A. & Lev, S. PYK2, a hub of signaling networks in breast cancer progression. Trends Cell Biol. 34, 312-326 (2024)
Wendt, M. K., Balanis, N., Carlin, C. R. & Schiemann, W. P. STAT3 and epithelial–mesenchymal transitions in carcinomas. JAK-STAT 3, e28975 (2014)
Wendt, M. K. et al. TGF-β stimulates Pyk2 expression as part of an epithelial-mesenchymal transition program required for metastatic outgrowth of breast cancer. Oncogene 32, 2005–2015 (2013)
Yakymovych, I., Yakymovych, M., Hamidi, A., Landström, M. & Heldin, C.-H. The type II TGF-β receptor phosphorylates Tyr182 in the type I receptor to activate downstream Src signaling. Sci. Signal. 15, eabp9521 (2022)
Eckert, M. A. et al. Twist1-Induced Invadopodia Formation Promotes Tumor Metastasis. Cancer Cell 19, 372–386 (2011)
Zhao, L. et al. Src promotes EGF-induced epithelial-to-mesenchymal transition and migration in gastric cancer cells by upregulating ZEB1 and ZEB2 through AKT. Cell biology international 42, 294-302 (2018)
Hlubek, F., Spaderna, S., Jung, A., Kirchner, T. & Brabletz, T. β-Catenin activates a coordinated expression of the proinvasive factors laminin-5 γ2 chain and MT1-MMP in colorectal carcinomas. Int. J. Cancer 108, 321–326 (2004)
Bae, G.-Y. et al. Loss of E-cadherin activates EGFR-MEK/ERK signaling, which promotes invasion via the ZEB1/MMP2 axis in non-small cell lung cancer. Oncotarget 4, 2512–2522 (2013)
Lu K, Dong JL & Fan WJ. Twist1/2 activates MMP2 expression via binding to its promoter in colorectal cancer. Eur Rev Med Pharmacol Sci. 22, 8210-8219 (2018)
Tang, Y.-L. et al. The clinical significance of integrin subunit alpha V in cancers: from small cell lung carcinoma to pan-cancer. BMC Pulm. Med. 22, 300 (2022)
Kariya, Y., Oyama, M., Suzuki, T. & Kariya, Y. αvβ3 Integrin induces partial EMT independent of TGF-β signaling. Commun. Biol. 4, 1–11 (2021)
Mamuya, F. A. & Duncan, M. K. aV integrins and TGF-β-induced EMT: a circle of regulation. J. Cell. Mol. Med. 16, 445–455 (2012)
Deng, Z. et al. TGF-β signaling in health, disease and therapeutics. Signal Transduct. Target. Ther. 9, 1–40 (2024)
Gifford, V. & Itoh, Y. MT1-MMP-dependent cell migration: proteolytic and non-proteolytic mechanisms. Biochem. Soc. Trans. 47, 811–826 (2019).
Balboni, A. L. et al. ΔNp63α-Mediated Activation of Bone Morphogenetic Protein Signaling Governs Stem Cell Activity and Plasticity in Normal and Malignant Mammary Epithelial Cells. Cancer Res. 73, 1020–1030 (2013)
Gonzalez, D. M. & Medici, D. Signaling mechanisms of the epithelial-mesenchymal transition. Sci. Signal. 7, re8–re8 (2014)
